# Supplementary material for: Benefit, Harm, and Cost-effectiveness Associated With Magnetic Resonance Imaging Before Biopsy in Age-based and Risk-stratified Screening for Prostate Cancer
Source: PubMed Central journal article supplement (PMC7953309; doi:10.1001/jamanetworkopen.2020.37657), 2021-03-11
Supplement: jamanetwopen-e2037657-s001.pdf [file jamanetwopen-e2037657-s001.pdf]

## Supplementary Online Content

Callender T, Emberton M, Morris S, Pharoah PDP, Pashayan N. Benefit, harm, and cost-effectiveness associated with magnetic resonance imaging before biopsy in age-based and risk-stratified screening for prostate cancer. *JAMA Netw Open*. 2021;4(3):e2037657. doi:10.1001/jamanetworkopen.2020.37657

### **eAppendix.**

**eTable 1.** Age-specific cumulative proportion eligible for screening by 10-year absolute risk threshold

**eTable 2.** Outcomes of biopsy-first no screening and biopsy-first screening for prostate cancer

**eTable 3.** Outcomes of MRI-first no screening and MRI-first screening for prostate cancer per 10,000 men

**eTable 4.** Outcomes of MRI-first no screening and MRI-first screening for prostate cancer per 10,000 men

**eFigure 1.** Population age distribution

**eFigure 2.** Cost-effectiveness acceptability curves showing MRI-first screening strategies

**eFigure 3.** Cost-effectiveness acceptability frontier showing MRI-first screening strategies

**eFigure 4.** Net monetary benefit of MRI-first and biopsy-first strategies

**eTable 5.** Outcomes of no screening and MRI-first screening for prostate cancer per 10,000 men under assumptions from the PRECISION trial

**eFigure 5.** Benefit/harm profile per 10,000 men with MRI-first screening using parameter estimates from the PRECISION trial

**eFigure 6.** Net monetary benefit per 10,000 men of MRI-first screening and no screening using parameter estimates from the PRECISION trial

**eFigure 7.** Net monetary benefit per 10,000 men of MRI-first screening and no screening at different costs of MRI

**eFigure 8.** Net monetary benefit per 10,000 men of MRI-first screening and no screening at different costs of polygenic risk stratification

**eFigure 9.** Net monetary benefit per 10,000 men of MRI-first screening and no screening at 75% uptake of PSA screening and polygenic risk stratification

**eFigure 10.** Overdiagnosed cancers and prostate cancer deaths prevented per 10,000 men of MRI-first risk-stratified compared to MRI-first age-based screening when overdiagnosis varies by polygenic risk

**eFigure 11.** Observed vs predicted incidence rate

**eFigure 12.** Observed vs predicted mortality rate

### **eReferences**

This supplementary material has been provided by the authors to give readers additional information about their work.

## eAppendix

### Polygenic risk

In England, the 10-year absolute risk of developing prostate cancer rises from 1.3% at age 50 to a peak of 7.2% at the age of 71.<sup>1</sup> Common genetic susceptibility variants explain between 52% and 63% of the population variation in prostate cancer risk, making it the most heritable form of cancer.<sup>2,3</sup> Common susceptibility loci are assumed to interact log-additively, leading to a lognormal distribution of polygenic risk in the population on a relative risk scale.<sup>4</sup> Known prostate cancer susceptibility variants define a log relative risk distribution of 0.68.<sup>5</sup> From this we derived the age-specific proportion of men above each 10-year absolute risk threshold, and the proportion of all cancers that would be diagnosed in these men.<sup>1</sup> These proportions were used to calculate the age-specific relative risk of developing prostate cancer in those men above and below the 10-year absolute risk thresholds.

Men in the highest 10% of this risk distribution have a risk of developing prostate cancer of ~2.5 relative to the mean whilst those in the lowest 10% of the distribution have a relative risk of approximately 0.2.

The cumulative age-specific proportions receiving at least one screen at 10-year absolute risk thresholds varying from 2% to 10% are shown in eTable 1.

**eTable 1: Age-specific cumulative proportion eligible for screening by 10-year absolute risk threshold**

| 10-year absolute risk threshold | Age  |      |      |      |      |      |      |      |      |      |      |      |      |      |      |
|---------------------------------|------|------|------|------|------|------|------|------|------|------|------|------|------|------|------|
|                                 | 55   | 56   | 57   | 58   | 59   | 60   | 61   | 62   | 63   | 64   | 65   | 66   | 67   | 68   | 69   |
| 2.0%                            | 0.46 | 0.50 | 0.52 | 0.55 | 0.58 | 0.60 | 0.62 | 0.64 | 0.65 | 0.67 | 0.68 | 0.70 | 0.71 | 0.72 | 0.73 |
| 2.5%                            | 0.36 | 0.39 | 0.42 | 0.44 | 0.47 | 0.49 | 0.51 | 0.54 | 0.55 | 0.57 | 0.59 | 0.60 | 0.62 | 0.63 | 0.64 |
| 3.0%                            | 0.28 | 0.31 | 0.33 | 0.36 | 0.38 | 0.41 | 0.43 | 0.45 | 0.47 | 0.49 | 0.50 | 0.52 | 0.54 | 0.55 | 0.56 |
| 3.5%                            | 0.22 | 0.25 | 0.27 | 0.29 | 0.31 | 0.34 | 0.36 | 0.38 | 0.40 | 0.42 | 0.43 | 0.45 | 0.47 | 0.48 | 0.49 |
| 4.0%                            | 0.17 | 0.20 | 0.22 | 0.24 | 0.26 | 0.28 | 0.30 | 0.32 | 0.34 | 0.36 | 0.37 | 0.39 | 0.41 | 0.42 | 0.43 |
| 4.5%                            | 0.14 | 0.16 | 0.18 | 0.20 | 0.21 | 0.23 | 0.25 | 0.27 | 0.29 | 0.31 | 0.32 | 0.34 | 0.35 | 0.37 | 0.38 |
| 5.0%                            | 0.11 | 0.13 | 0.14 | 0.16 | 0.18 | 0.20 | 0.21 | 0.23 | 0.25 | 0.26 | 0.28 | 0.30 | 0.31 | 0.32 | 0.33 |
| 5.5%                            | 0.09 | 0.11 | 0.12 | 0.13 | 0.15 | 0.17 | 0.18 | 0.20 | 0.21 | 0.23 | 0.24 | 0.26 | 0.27 | 0.28 | 0.29 |
| 6.0%                            | 0.07 | 0.09 | 0.10 | 0.11 | 0.13 | 0.14 | 0.16 | 0.17 | 0.18 | 0.20 | 0.21 | 0.23 | 0.24 | 0.25 | 0.26 |
| 6.5%                            | 0.06 | 0.07 | 0.08 | 0.09 | 0.11 | 0.12 | 0.13 | 0.15 | 0.16 | 0.17 | 0.19 | 0.20 | 0.21 | 0.22 | 0.23 |
| 7.0%                            | 0.05 | 0.06 | 0.07 | 0.08 | 0.09 | 0.10 | 0.12 | 0.13 | 0.14 | 0.15 | 0.16 | 0.17 | 0.19 | 0.20 | 0.20 |
| 7.5%                            | 0.04 | 0.05 | 0.06 | 0.07 | 0.08 | 0.09 | 0.10 | 0.11 | 0.12 | 0.13 | 0.14 | 0.15 | 0.16 | 0.17 | 0.18 |
| 8.0%                            | 0.04 | 0.04 | 0.05 | 0.06 | 0.07 | 0.08 | 0.09 | 0.10 | 0.11 | 0.12 | 0.13 | 0.14 | 0.15 | 0.16 | 0.16 |
| 8.5%                            | 0.03 | 0.04 | 0.04 | 0.05 | 0.06 | 0.07 | 0.08 | 0.08 | 0.09 | 0.10 | 0.11 | 0.12 | 0.13 | 0.14 | 0.15 |
| 9.0%                            | 0.03 | 0.03 | 0.04 | 0.04 | 0.05 | 0.06 | 0.07 | 0.07 | 0.08 | 0.09 | 0.10 | 0.11 | 0.12 | 0.12 | 0.13 |
| 9.5%                            | 0.02 | 0.03 | 0.03 | 0.04 | 0.04 | 0.05 | 0.06 | 0.07 | 0.07 | 0.08 | 0.09 | 0.10 | 0.10 | 0.11 | 0.12 |
| 10%                             | 0.02 | 0.02 | 0.03 | 0.03 | 0.04 | 0.04 | 0.05 | 0.06 | 0.06 | 0.07 | 0.08 | 0.09 | 0.09 | 0.10 | 0.11 |

The cumulative proportion of the population eligible for a screen by age and 10-year absolute risk threshold. For example, at a risk threshold of 2%, at the age of 55 46.4% of the population are eligible for screening. At age 56, 53.4% of individuals are eligible for screening. There are 341,434 men aged 55 and 330,382 aged 56. Therefore, the cumulative proportion screened by age 56 is  $(341,434 \times 0.464 + 330,382 \times 0.534) / (341,434 + 330,382) = 0.5$ . The age-specific population and the proportion eligible for screening are available with the source code for this analysis <https://github.com/callta/PRIMARI>.

## Costing descriptions

A detailed description of the costs used, and their derivation, has been published elsewhere.<sup>1</sup> We have adjusted the cost of cancer staging and assessment, and that of active surveillance to reflect the updated 2019 National Institute for Health and Care Excellence (NICE) guidelines.<sup>6</sup>

Prostate biopsy costs were based on NICE estimates of the cost of a TRUS and perineal biopsy with relevant histopathology (£311.79 and £652.40, respectively).<sup>7</sup> The 2018 National Prostate Cancer Audit showed that 88% of men with prostate cancer in England had a TRUS biopsy and 12% a perineal biopsy. An assumed 1.4% will be admitted to hospital post-biopsy with complications,<sup>8</sup> with each hospital admission for sepsis costing an average of £1859 (WJ06G/H/J).<sup>9</sup> The final cost for a biopsy was £378.68 ((352.66 + (0.014 x 1859)).

The last year for which NHS Reference Costs were published was 2015/2016. We have therefore used the hospital services index of the Consumer Price Index (CPI) as published by the UK Office for National Statistics to inflate the values from 2015 to January 2020, over which period there has been a 20% rise in prices.<sup>10</sup>

| <i>Assessing suspected prostate cancer – if MRI suggestive of prostate cancer</i> |                        |       |          |
|-----------------------------------------------------------------------------------|------------------------|-------|----------|
| Stage of pathway                                                                  | Description            | Items | Cost (£) |
| Diagnosis & Staging                                                               | Biopsy                 | 1     | 378.68   |
|                                                                                   | Urological appointment | 1     | 105.19   |
| <i>Total cost per patient (including inflation of 20%)</i>                        |                        |       | 580.66   |

We assumed that those who have a positive biopsy would not require a further MRI.

| <i>Assessing suspected prostate cancer – if biopsy positive</i> |                        |       |          |
|-----------------------------------------------------------------|------------------------|-------|----------|
| Stage of pathway                                                | Description            | Items | Cost (£) |
| Diagnosis & Staging                                             | Isotope bone scan      | 1     | 242      |
|                                                                 | Urological MDT         | 1     | 107      |
|                                                                 | Urological appointment | 1     | 105.19   |
| <i>Total cost per patient (including inflation of 20%)</i>      |                        |       | 545.03   |

Following the ProtecT trial,<sup>11</sup> we assumed that 45% of those eligible will have active surveillance for a period of 10-years, with the remaining 55% having either radical prostatectomy or radiotherapy.<sup>1</sup>

| <i>Active surveillance – 2019 NICE protocol</i>                                                                                                                                                                                                                                                                   |                                                           |                        |          |
|-------------------------------------------------------------------------------------------------------------------------------------------------------------------------------------------------------------------------------------------------------------------------------------------------------------------|-----------------------------------------------------------|------------------------|----------|
| Year(s)                                                                                                                                                                                                                                                                                                           | Description                                               | Items                  | Cost (£) |
| 1                                                                                                                                                                                                                                                                                                                 | PSA test                                                  | 3                      | 33.78    |
|                                                                                                                                                                                                                                                                                                                   | Urological appointment (digital rectal examination [DRE]) | 2                      | 210.38   |
| 2-4                                                                                                                                                                                                                                                                                                               | PSA test                                                  | 2                      | 67.56    |
|                                                                                                                                                                                                                                                                                                                   | Urological appointment (DRE)                              | 2                      | 631.14   |
| 5 onwards                                                                                                                                                                                                                                                                                                         | PSA test                                                  | 2 per year for 5 years | 112.60   |
|                                                                                                                                                                                                                                                                                                                   | Urological appointment (DRE)                              | 1 per year for 5 years | 525.95   |
| <i>Total cost per patient (including inflation of 20%)</i>                                                                                                                                                                                                                                                        |                                                           |                        | 1897.69  |
| <i>Note, the total cost of active surveillance used in the model assumes 45% will have active surveillance over 10 years whilst 55% will have radical therapy. Active surveillance involves an MRI in those who have not had one already. The number and cost of MRI is accounted for elsewhere in the model.</i> |                                                           |                        |          |

## Resource use

### Magnetic Resonance Imaging

In the screened cohorts, we estimated the number of multi-parametric Magnetic Resonance Imaging (MRI) scans by multiplying the number of individuals screened by the age-specific proportion estimated to have a PSA of  $\geq 3$  ng/ml, derived from the ProtecT trial.<sup>12</sup>

### Biopsies

In the non-screened cohort, the number of biopsies was estimated from PROMIS, in which there were 1.88 biopsies for every cancer detected in a clinically-suspected cohort diagnosed using MRI prior to biopsy.<sup>13</sup> This was modelled in probabilistic analyses using a normal distribution and a standard deviation of 0.1.

Two recent meta-analyses have shown that MRI prior to biopsy leads to a third of biopsies being avoided amongst cohorts with clinically-suspected prostate cancer.<sup>14,15</sup> We assume that under real-world scenarios 20% of those with an MRI score of 1-2 will go on to have biopsy, so the final reduction in the number of biopsies was estimated to be 26.4% (33% x 0.8). This real-world scenario assumption is taken from the NICE 2019 update to the prostate cancer diagnosis guidelines, which used expert opinion to derive the 20% figure.<sup>16</sup>

### Incidence

By comparison with a biopsy-first approach, MRI followed by biopsy leads to a reduction in the number of clinically *insignificant* (Gleason 6) cancers detected, and an increase in the number of clinically *significant* cancers (Gleason  $\geq 7$ ) detected.<sup>14,15</sup> There have been > 25 studies reporting relevant results. In Drost and colleagues Cochrane systematic review and meta-analysis, the pooled absolute difference in the proportion of men detected with clinically significant and clinically insignificant cancers by MRI and systematic biopsy were:<sup>14</sup>

- 8.2% (95% CI: 6% to 10.3%) reduction in clinically insignificant cancers
- 2% (95% CI: 1.1% to 4.6%) increase in clinically significant cancers

We applied these values to the:

- baseline incidence of prostate cancer, taking into account the age-specific proportion of cancers detected by stage as seen in the ECRIC database of all clinically detected cases in East Anglia, England.<sup>17</sup>
- relative increase in incidence of prostate cancer with screening, adjusting for the age-specific proportion of cancers detected by stage in the ProtecT trial.<sup>17</sup>

When the tumour grade of a prostate cancer is incorrectly assigned, this is known as misclassification. Cancers misclassified as insignificant in a screening programme are likely to go on to become interval cancers, some of which will be clinically detected. Using the results of the Trio study comparing MRI-targeted, systematic, and both MRI-targeted and systematic biopsy, we have estimated the proportion of cancers incorrectly classified as *insignificant* (Gleason 6) as 2.76%, 95% CI: 2.06% to 3.46%.<sup>18</sup>

### Mortality

By detecting more clinically significant disease that might otherwise have been detected at a more advanced stage, alongside evidence for the potential of MRI to enhance pre-therapeutic risk assessment to improve outcomes,<sup>19</sup> the use of MRI prior to biopsy is expected to translate into a reduction in mortality. We have adjusted baseline population prostate-cancer-specific mortality, taking into account the age-specific distribution of cancers at diagnosis, to reflect the impact of MRI.

As there are no data to support a change in relative risk of mortality from prostate cancer with screening in the context of MRI, we have not adjusted this relative risk. Our results are therefore likely to be conservative. However, this reduces the number of assumptions where empirical evidence is not available.

## Overdiagnosis

Age-specific overdiagnosis was estimated by multiplying the number of cases by  $(-0.62 + \text{age} \times 0.014)$ , derived from Pashayan and colleagues estimates of overdiagnosis with PSA screening.<sup>20</sup> To account for the impact of MRI, we then adjusted the proportion of cases estimated to be overdiagnosed with screening by multiplying this figure by the decrease in clinically *insignificant* cancers detected.

We calculated the ratio of overdiagnosed cancers to prostate cancer deaths prevented by dividing overdiagnosed cancers by the change in total number of prostate cancer deaths between no screening and the relevant screening strategy.

**eTable 2: Outcomes of biopsy-first no screening and biopsy-first screening for prostate cancer**

| Screening strategy                                | Prostate cancer cases (n) | Screen-detected cancers (n) | Overdiagnosed Cases (n) | Deaths from prostate cancer (n) | MRI (n) | Biopsies (n) | Total life-years (n) | QALYs with prostate cancer (n) | QALYs - healthy (n) | Total QALYs (n) | Total Costs (£) | Net Monetary Benefit (£ 1,000s) |
|---------------------------------------------------|---------------------------|-----------------------------|-------------------------|---------------------------------|---------|--------------|----------------------|--------------------------------|---------------------|-----------------|-----------------|---------------------------------|
| No screening                                      | 537,870                   |                             | -                       | 192,433                         | 333,508 | 924,050      | 60,327,337           | 1,832,919                      | 44,853,750          | 46,686,669      | 3,483           | 930,251                         |
| Age-based screening                               | 644,501                   | 307,729                     | 83,006                  | 155,202                         | 399,651 | 1,926,315    | 60,454,271           | 2,757,589                      | 43,940,443          | 46,698,032      | 4,386           | 929,575                         |
| Risk-stratified screening (10-year absolute risk) |                           |                             |                         |                                 |         |              |                      |                                |                     |                 |                 |                                 |
| 2.0%                                              | 623,499                   | 274,217                     | 74,308                  | 157,682                         | 386,627 | 1,801,032    | 60,445,134           | 2,640,192                      | 44,061,561          | 46,701,753      | 4,295           | 929,740                         |
| 2.5%                                              | 614,977                   | 257,394                     | 69,898                  | 159,204                         | 381,342 | 1,741,613    | 60,439,794           | 2,585,244                      | 44,117,461          | 46,702,705      | 4,233           | 929,821                         |
| 3.0%                                              | 606,692                   | 240,071                     | 65,335                  | 160,856                         | 376,204 | 1,681,269    | 60,434,025           | 2,529,393                      | 44,174,027          | 46,703,421      | 4,172           | 929,896                         |
| 3.5%                                              | 598,893                   | 222,995                     | 60,815                  | 162,554                         | 371,366 | 1,622,416    | 60,428,112           | 2,474,823                      | 44,229,093          | 46,703,916      | 4,115           | 929,963                         |
| 4.0%                                              | 591,693                   | 206,594                     | 56,457                  | 164,242                         | 366,900 | 1,566,393    | 60,422,242           | 2,422,768                      | 44,281,451          | 46,704,219      | 4,062           | 930,022                         |
| 4.5%                                              | 585,129                   | 191,099                     | 52,323                  | 165,886                         | 362,829 | 1,513,873    | 60,416,534           | 2,373,868                      | 44,330,493          | 46,704,360      | 4,013           | 930,074                         |
| 5.0%                                              | 579,195                   | 176,613                     | 48,446                  | 167,464                         | 359,149 | 1,465,122    | 60,411,059           | 2,328,390                      | 44,375,978          | 46,704,368      | 3,969           | 930,118                         |
| 5.5%                                              | 573,861                   | 163,164                     | 44,835                  | 168,965                         | 355,841 | 1,420,162    | 60,405,856           | 2,286,380                      | 44,417,888          | 46,704,268      | 3,929           | 930,157                         |
| 6.0%                                              | 569,087                   | 150,735                     | 41,489                  | 170,383                         | 352,879 | 1,378,878    | 60,400,943           | 2,247,752                      | 44,456,329          | 46,704,081      | 3,893           | 930,189                         |
| 6.5%                                              | 564,825                   | 139,283                     | 38,397                  | 171,717                         | 350,236 | 1,341,074    | 60,396,326           | 2,212,343                      | 44,491,483          | 46,703,826      | 3,860           | 930,217                         |
| 7.0%                                              | 561,029                   | 128,751                     | 35,547                  | 172,969                         | 347,881 | 1,306,521    | 60,392,000           | 2,179,952                      | 44,523,564          | 46,703,517      | 3,830           | 930,240                         |
| 7.5%                                              | 557,654                   | 119,075                     | 32,922                  | 174,140                         | 345,788 | 1,274,971    | 60,387,956           | 2,150,362                      | 44,552,804          | 46,703,166      | 3,804           | 930,259                         |
| 8.0%                                              | 554,658                   | 110,192                     | 30,507                  | 175,235                         | 343,929 | 1,246,180    | 60,384,181           | 2,123,353                      | 44,579,432          | 46,702,785      | 3,780           | 930,275                         |
| 8.5%                                              | 552,000                   | 102,038                     | 28,286                  | 176,257                         | 342,280 | 1,219,911    | 60,380,660           | 2,098,710                      | 44,603,670          | 46,702,380      | 3,759           | 930,289                         |
| 9.0%                                              | 549,646                   | 94,552                      | 26,243                  | 177,211                         | 340,820 | 1,195,942    | 60,377,379           | 2,076,231                      | 44,625,728          | 46,701,959      | 3,740           | 930,299                         |
| 9.5%                                              | 547,562                   | 87,678                      | 24,364                  | 178,102                         | 339,527 | 1,174,064    | 60,374,322           | 2,055,724                      | 44,645,804          | 46,701,528      | 3,723           | 930,308                         |
| 10.0%                                             | 545,719                   | 81,361                      | 22,634                  | 178,934                         | 338,384 | 1,154,086    | 60,371,474           | 2,037,013                      | 44,664,079          | 46,701,092      | 3,707           | 930,315                         |

In all scenarios shown in eTable 2, both clinically-detected and screen-detected cancers were assumed to follow pre-2019 NICE guidelines for diagnosis (i.e. biopsy-first, then MRI depending on further assessment needs). The number of prostate cancer cases includes the number of overdiagnosed cancers. Net monetary benefit at a willingness-to-pay threshold of £20,000 (\$26,000) per QALY gained. Results are the average of 10,000 simulations. To convert to US \$, multiply by approximately 1.3. Abbreviations: QALYs, quality-adjusted life-years.

**eTable 3: Outcomes of biopsy-first no screening and biopsy-first screening for prostate cancer per 10,000 men**

| Screening strategy                                | Prostate cancer cases (n) | Screen-detected cancers (n) | Overdiag-nosed Cases (n) | Deaths from prostate cancer (n) | MRI (n) | Biopsies (n) | Total life-years (n) | QALYs with prostate cancer (n) | QALYs - healthy (n) | Total QALYs (n) | Total Costs (£) | Net Monetary Benefit (£ 1,000s) |
|---------------------------------------------------|---------------------------|-----------------------------|--------------------------|---------------------------------|---------|--------------|----------------------|--------------------------------|---------------------|-----------------|-----------------|---------------------------------|
| No screening                                      | 1,200                     | -                           | -                        | 429                             | 744     | 2,061        | 134,548              | 4,088                          | 100,037             | 104,125         | 7,767,680       | 2,074,736                       |
| Age-based screening                               | 1,437                     | 686                         | 185                      | 346                             | 891     | 4,296        | 134,831              | 6,150                          | 98,000              | 104,151         | 9,781,447       | 2,073,229                       |
| Risk-stratified screening (10-year absolute risk) |                           |                             |                          |                                 |         |              |                      |                                |                     |                 |                 |                                 |
| 2.0%                                              | 1,391                     | 612                         | 166                      | 352                             | 862     | 4,017        | 134,811              | 5,888                          | 98,270              | 104,159         | 9,579,247       | 2,073,598                       |
| 2.5%                                              | 1,372                     | 574                         | 156                      | 355                             | 851     | 3,884        | 134,799              | 5,766                          | 98,395              | 104,161         | 9,440,576       | 2,073,779                       |
| 3.0%                                              | 1,353                     | 535                         | 146                      | 359                             | 839     | 3,750        | 134,786              | 5,641                          | 98,521              | 104,163         | 9,305,467       | 2,073,946                       |
| 3.5%                                              | 1,336                     | 497                         | 136                      | 363                             | 828     | 3,618        | 134,773              | 5,520                          | 98,644              | 104,164         | 9,177,822       | 2,074,096                       |
| 4.0%                                              | 1,320                     | 461                         | 126                      | 366                             | 818     | 3,494        | 134,760              | 5,403                          | 98,761              | 104,164         | 9,059,413       | 2,074,227                       |
| 4.5%                                              | 1,305                     | 426                         | 117                      | 370                             | 809     | 3,376        | 134,747              | 5,294                          | 98,870              | 104,165         | 8,950,822       | 2,074,342                       |
| 5.0%                                              | 1,292                     | 394                         | 108                      | 373                             | 801     | 3,268        | 134,735              | 5,193                          | 98,972              | 104,165         | 8,851,963       | 2,074,442                       |
| 5.5%                                              | 1,280                     | 364                         | 100                      | 377                             | 794     | 3,167        | 134,723              | 5,099                          | 99,065              | 104,164         | 8,762,400       | 2,074,527                       |
| 6.0%                                              | 1,269                     | 336                         | 93                       | 380                             | 787     | 3,075        | 134,712              | 5,013                          | 99,151              | 104,164         | 8,681,517       | 2,074,599                       |
| 6.5%                                              | 1,260                     | 311                         | 86                       | 383                             | 781     | 2,991        | 134,702              | 4,934                          | 99,229              | 104,163         | 8,608,629       | 2,074,661                       |
| 7.0%                                              | 1,251                     | 287                         | 79                       | 386                             | 776     | 2,914        | 134,692              | 4,862                          | 99,301              | 104,163         | 8,543,037       | 2,074,713                       |
| 7.5%                                              | 1,244                     | 266                         | 73                       | 388                             | 771     | 2,844        | 134,683              | 4,796                          | 99,366              | 104,162         | 8,484,064       | 2,074,756                       |
| 8.0%                                              | 1,237                     | 246                         | 68                       | 391                             | 767     | 2,779        | 134,675              | 4,736                          | 99,425              | 104,161         | 8,431,069       | 2,074,792                       |
| 8.5%                                              | 1,231                     | 228                         | 63                       | 393                             | 763     | 2,721        | 134,667              | 4,681                          | 99,479              | 104,160         | 8,383,463       | 2,074,821                       |
| 9.0%                                              | 1,226                     | 211                         | 59                       | 395                             | 760     | 2,667        | 134,660              | 4,631                          | 99,529              | 104,159         | 8,340,704       | 2,074,845                       |
| 9.5%                                              | 1,221                     | 196                         | 54                       | 397                             | 757     | 2,619        | 134,653              | 4,585                          | 99,573              | 104,158         | 8,302,300       | 2,074,865                       |
| 10.0%                                             | 1,217                     | 181                         | 50                       | 399                             | 755     | 2,574        | 134,646              | 4,543                          | 99,614              | 104,157         | 8,267,809       | 2,074,880                       |

Results, equivalent to eTable 2, however shown per 10,000 men. In all scenarios shown in eTable 2, both clinically-detected and screen-detected cancers were assumed to follow pre-2019 NICE guidelines for diagnosis (i.e. biopsy-first, then MRI depending on further assessment needs). The number of prostate cancer cases includes the number of overdiagnosed cancers. Net monetary benefit at a willingness-to-pay threshold of £20,000 (\$26,000) per QALY gained. Results are the average of 10,000 simulations. To convert to US \$, multiply by approximately 1.3. Abbreviations: QALYs, quality-adjusted life-years.



**eTable 4: Outcomes of MRI-first no screening and MRI-first screening for prostate cancer per 10,000 men**

| Screening strategy                                | Prostate cancer cases (n) | Screen-detected cancers (n) | Overdiag-nosed Cases (n) | Deaths from prostate cancer (n) | MRI (n) | Biopsies (n) | Total life-years (n) | QALYs with prostate cancer (n) | QALYs - healthy (n) | Total QALYs (n) | Total Costs (£) | Net Monetary Benefit (£ 1,000s) |
|---------------------------------------------------|---------------------------|-----------------------------|--------------------------|---------------------------------|---------|--------------|----------------------|--------------------------------|---------------------|-----------------|-----------------|---------------------------------|
| No Screening                                      | 1,177                     | -                           | -                        | 425                             | 2,022   | 1,357        | 134,561              | 3,987                          | 100,156             | 104,144         | 7,741,163       | 2,075,133                       |
| Age-based screening                               | 1,394                     | 636                         | 158                      | 343                             | 4,239   | 2,845        | 134,841              | 5,841                          | 98,344              | 104,186         | 9,774,274       | 2,073,943                       |
| Risk-stratified screening (10-year absolute risk) |                           |                             |                          |                                 |         |              |                      |                                |                     |                 |                 |                                 |
| 2.0%                                              | 1,351                     | 567                         | 141                      | 349                             | 3,320   | 2,228        | 134,821              | 5,608                          | 98,584              | 104,192         | 9,251,240       | 2,074,583                       |
| 2.5%                                              | 1,334                     | 533                         | 133                      | 352                             | 3,063   | 2,056        | 134,809              | 5,499                          | 98,694              | 104,193         | 9,023,766       | 2,074,831                       |
| 3.0%                                              | 1,317                     | 497                         | 124                      | 356                             | 2,849   | 1,912        | 134,797              | 5,387                          | 98,806              | 104,193         | 8,828,016       | 2,075,037                       |
| 3.5%                                              | 1,301                     | 462                         | 116                      | 359                             | 2,673   | 1,795        | 134,783              | 5,279                          | 98,915              | 104,193         | 8,662,496       | 2,075,203                       |
| 4.0%                                              | 1,286                     | 428                         | 107                      | 363                             | 2,531   | 1,699        | 134,770              | 5,175                          | 99,018              | 104,193         | 8,523,662       | 2,075,335                       |
| 4.5%                                              | 1,273                     | 396                         | 100                      | 367                             | 2,415   | 1,621        | 134,758              | 5,077                          | 99,116              | 104,192         | 8,407,621       | 2,075,439                       |
| 5.0%                                              | 1,261                     | 366                         | 92                       | 370                             | 2,322   | 1,559        | 134,746              | 4,986                          | 99,206              | 104,192         | 8,310,757       | 2,075,519                       |
| 5.5%                                              | 1,250                     | 338                         | 85                       | 374                             | 2,246   | 1,508        | 134,734              | 4,901                          | 99,289              | 104,191         | 8,229,924       | 2,075,580                       |
| 6.0%                                              | 1,240                     | 313                         | 79                       | 377                             | 2,184   | 1,466        | 134,723              | 4,824                          | 99,366              | 104,189         | 8,162,462       | 2,075,625                       |
| 6.5%                                              | 1,231                     | 289                         | 73                       | 380                             | 2,134   | 1,433        | 134,713              | 4,753                          | 99,435              | 104,188         | 8,106,152       | 2,075,657                       |
| 7.0%                                              | 1,224                     | 267                         | 68                       | 382                             | 2,094   | 1,406        | 134,704              | 4,688                          | 99,499              | 104,187         | 8,059,157       | 2,075,679                       |
| 7.5%                                              | 1,217                     | 247                         | 63                       | 385                             | 2,061   | 1,384        | 134,695              | 4,628                          | 99,558              | 104,186         | 8,019,960       | 2,075,692                       |
| 8.0%                                              | 1,211                     | 229                         | 58                       | 387                             | 2,035   | 1,366        | 134,686              | 4,574                          | 99,611              | 104,184         | 7,987,302       | 2,075,698                       |
| 8.5%                                              | 1,205                     | 212                         | 54                       | 390                             | 2,014   | 1,352        | 134,679              | 4,524                          | 99,659              | 104,183         | 7,960,144       | 2,075,699                       |
| 9.0%                                              | 1,200                     | 197                         | 50                       | 392                             | 1,997   | 1,340        | 134,671              | 4,479                          | 99,703              | 104,182         | 7,937,620       | 2,075,695                       |
| 9.5%                                              | 1,196                     | 182                         | 47                       | 394                             | 1,983   | 1,331        | 134,665              | 4,437                          | 99,743              | 104,180         | 7,919,009       | 2,075,687                       |
| 10.0%                                             | 1,192                     | 169                         | 43                       | 396                             | 1,972   | 1,324        | 134,658              | 4,400                          | 99,779              | 104,179         | 7,903,710       | 2,075,677                       |

In all scenarios shown in eTable 3, both clinically-detected and screen-detected cancers were assumed to have an MRI prior to biopsy. Net monetary benefit at a willingness-to-pay threshold of £20,000 (\$26,000) per QALY gained. Based on 10,000 simulations. To convert to US \$, multiply by approximately 1.3. Table 3 in the main manuscript is equivalent to eTable 4, but showing results for the full 4.48 million men. Abbreviations: QALYs, quality-adjusted life-years.

**eFigure 1: Population age distribution**

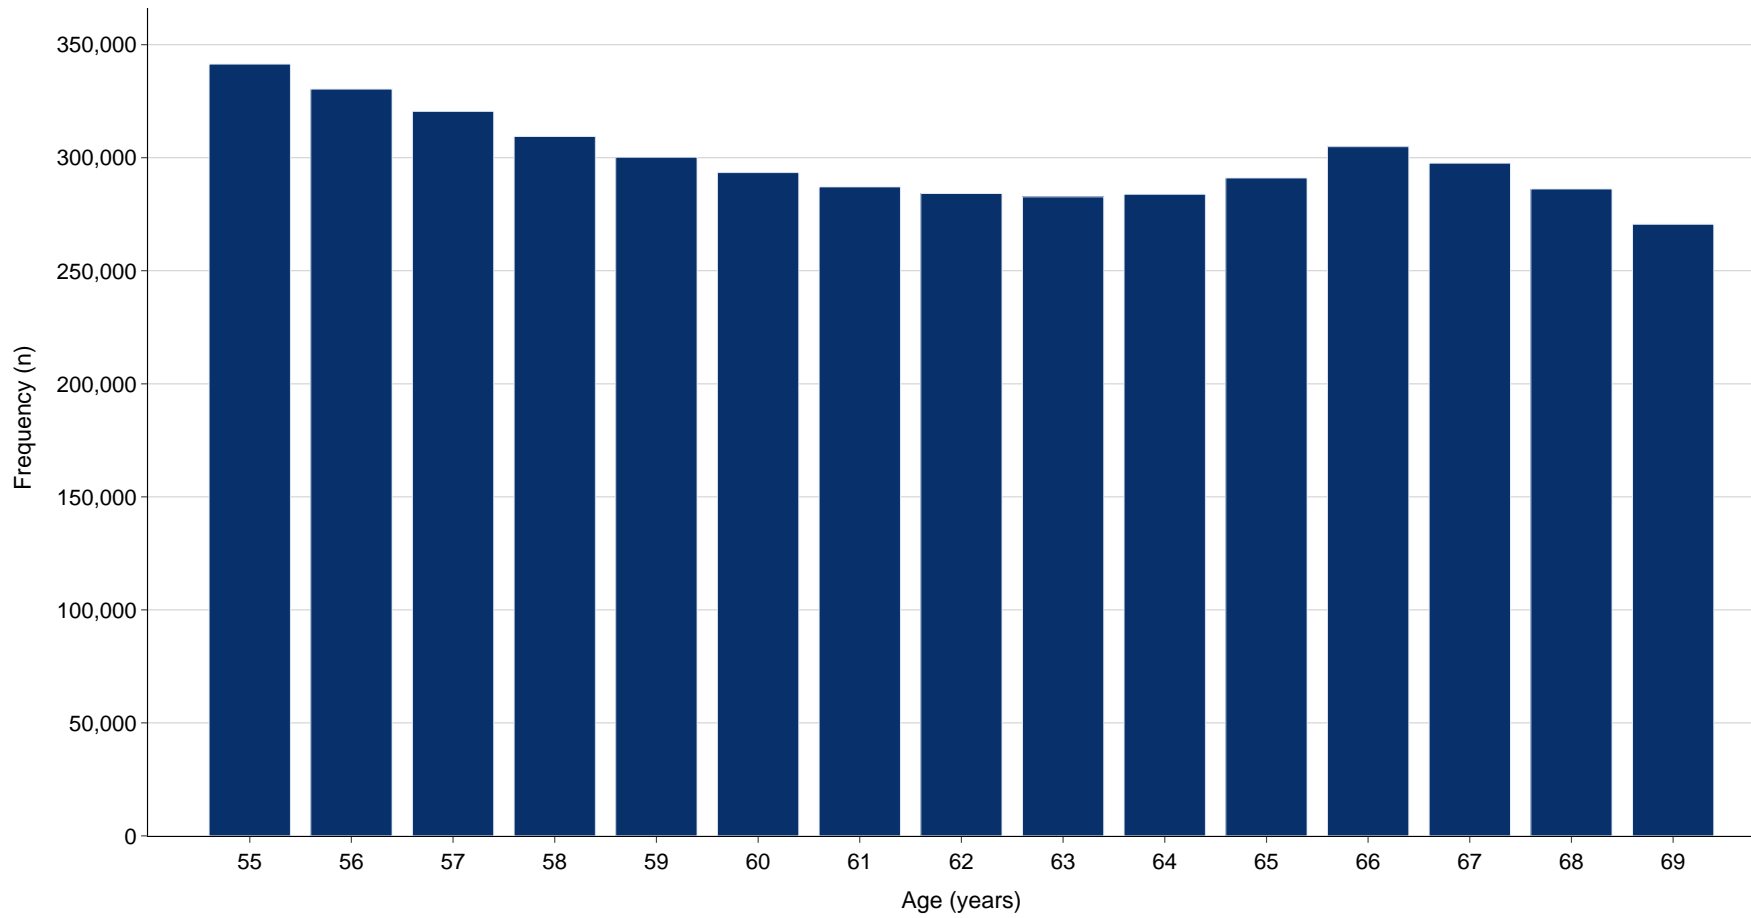

Age distribution of the hypothetical cohorts of 4.48 million men, representing all men in England aged 55-69. Values are an average of the population size in 2013-2016.

**eFigure 2: Cost-effectiveness acceptability curves showing MRI-first screening strategies**

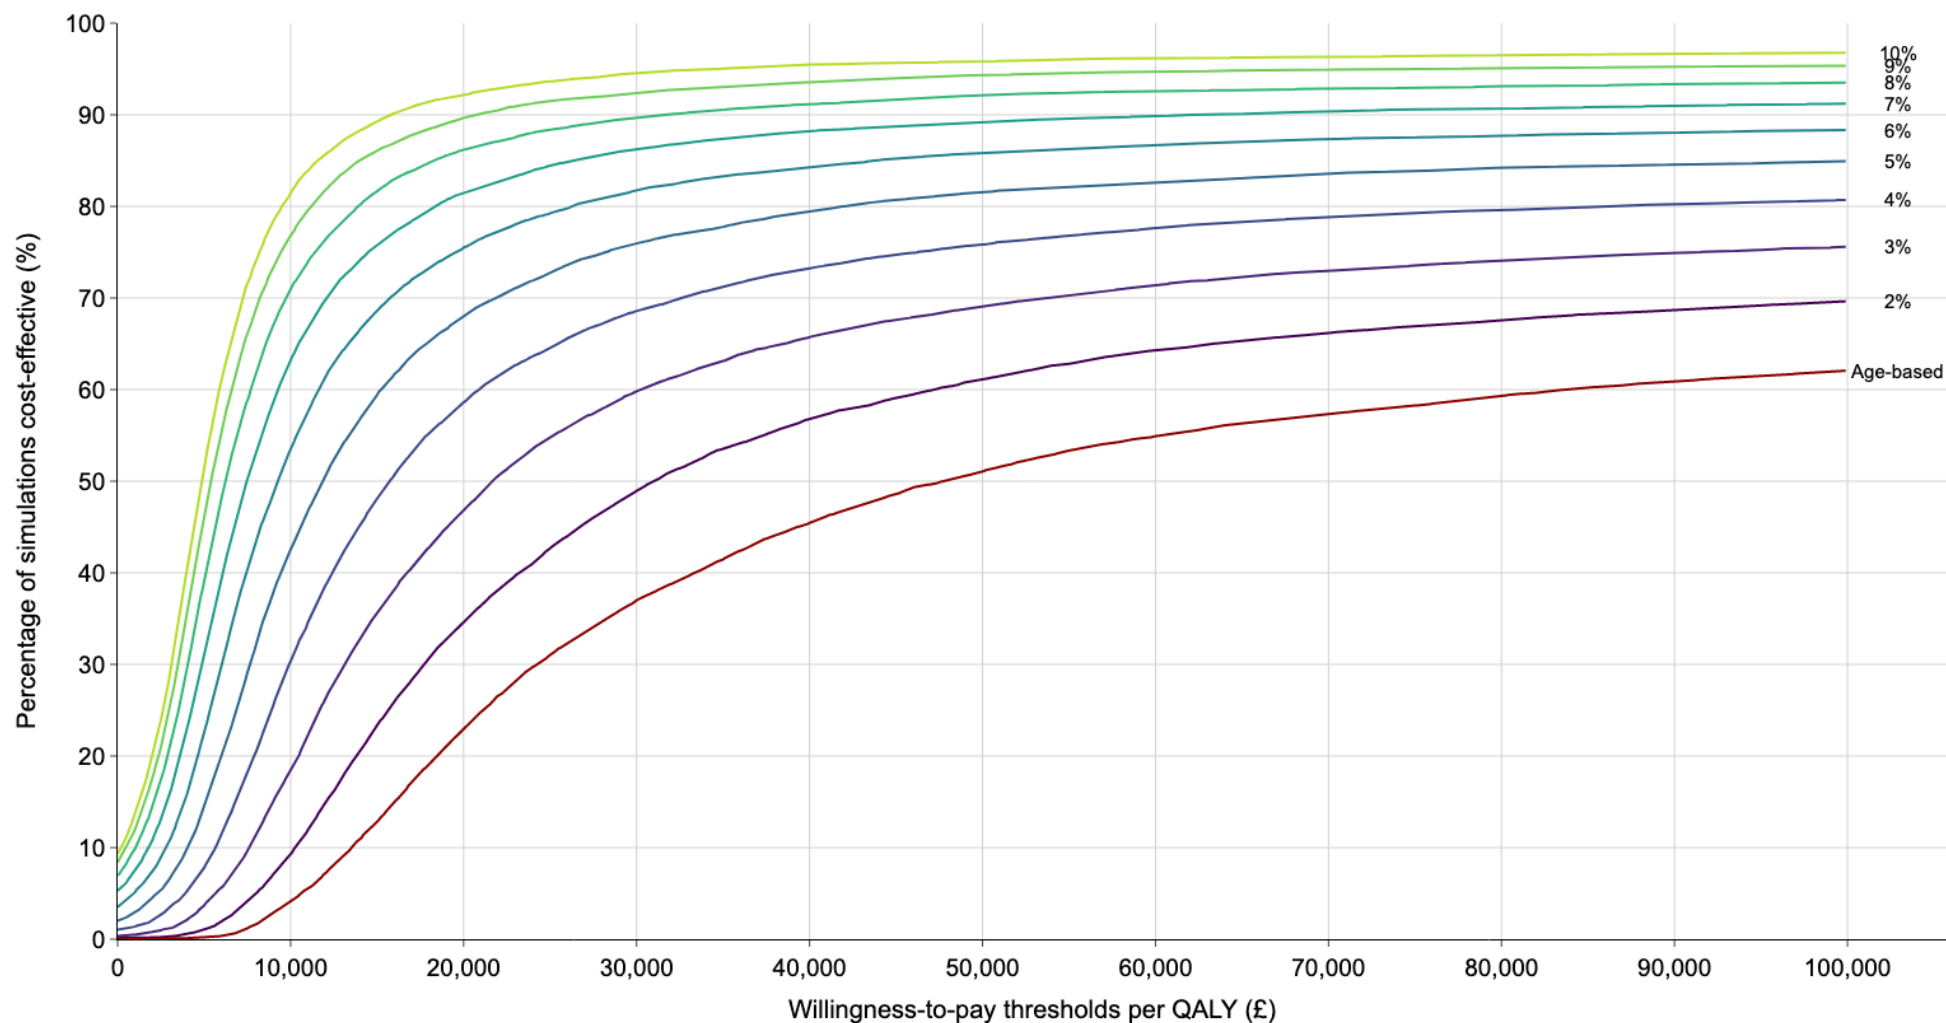

Cost-effectiveness acceptability curves (CEAC) of selected MRI-first screening strategies shown. Each CEAC shows the probability at a specific willingness-to-pay threshold of that strategy having a higher net monetary benefit than no screening. To convert to US \$, multiply by approximately 1.3. Abbreviation: QALY, quality-adjusted life-year.

**eFigure 3: Cost-effectiveness acceptability frontier showing MRI-first screening strategies**

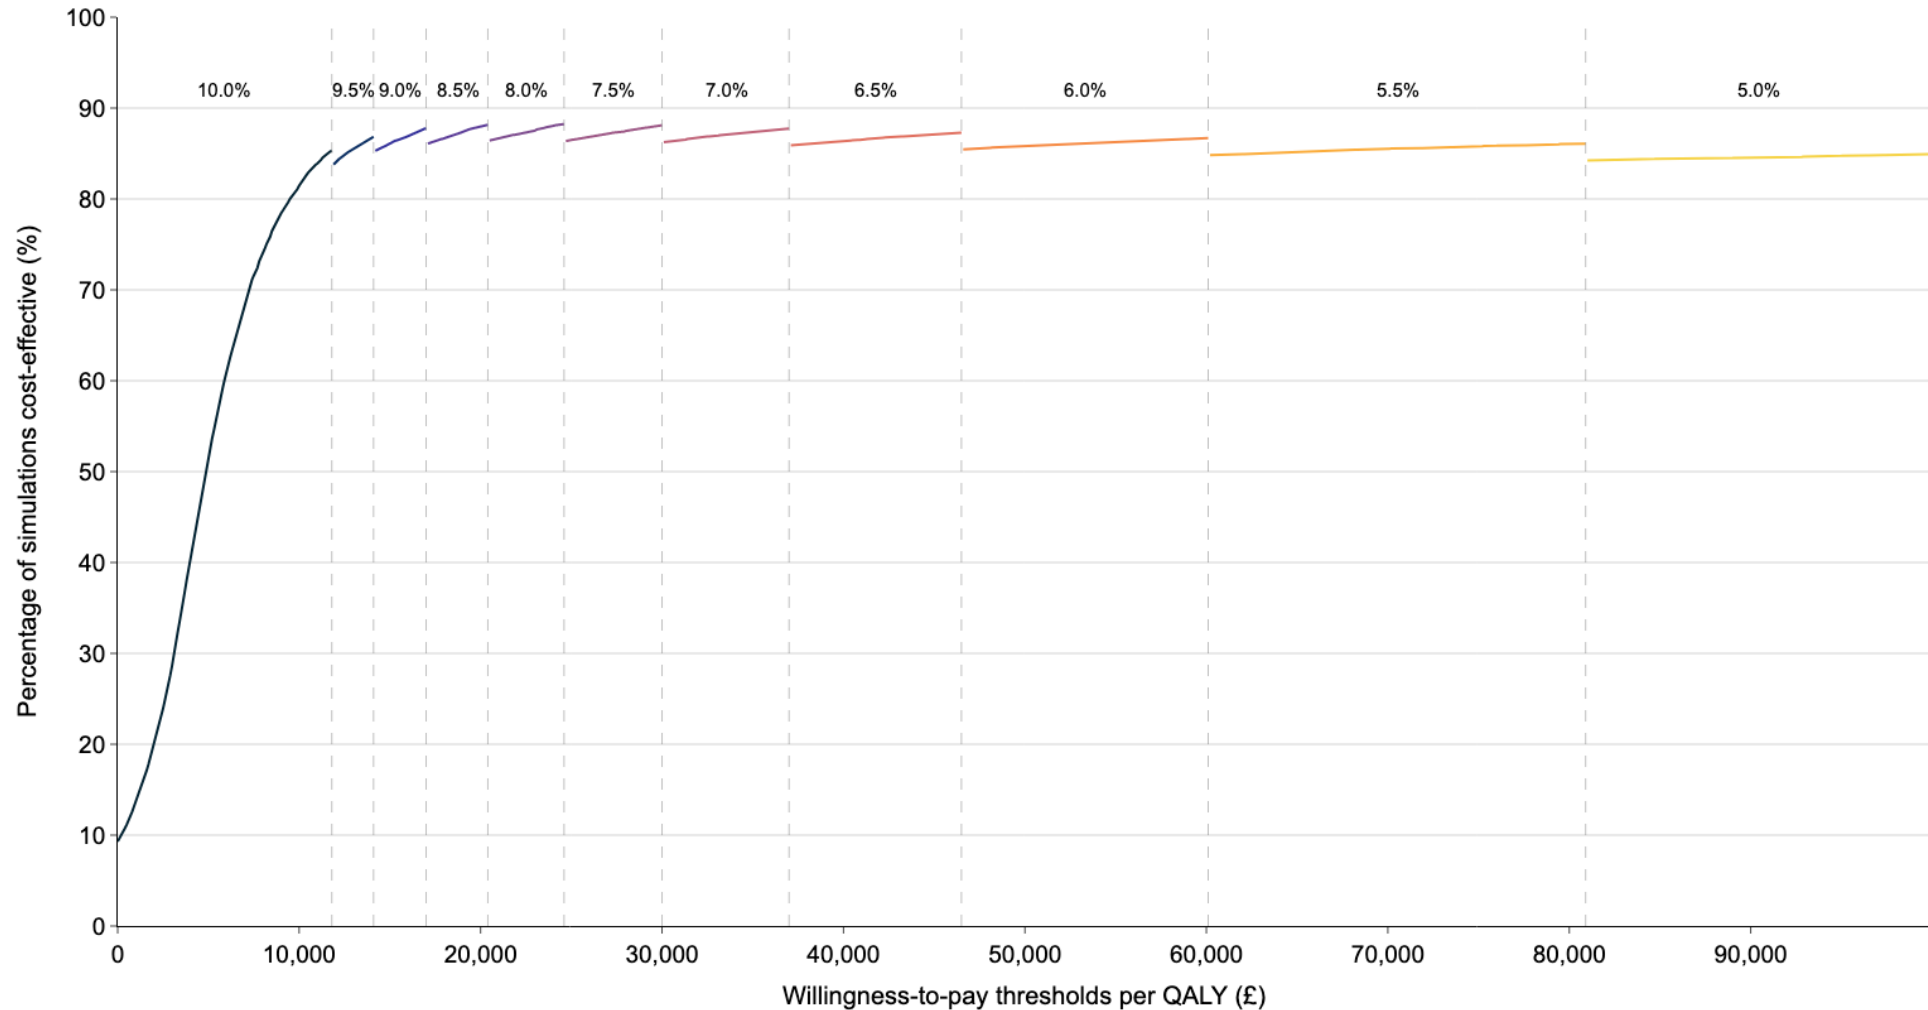

Cost-effectiveness acceptability frontier showing the screening strategy with the highest net monetary benefit at each willingness-to-pay (WTP) threshold, and the probability at that given WTP threshold that the strategy has a higher net monetary benefit than no screening. The strategy is indicated in writing towards the top of the graph (risk-stratified screening at absolute risk thresholds from 10% to 5%). To convert to US \$, multiply by approximately 1.3. Abbreviation: QALY, quality-adjusted life-year.

**eFigure 4: Net monetary benefit of MRI-first and biopsy-first strategies**

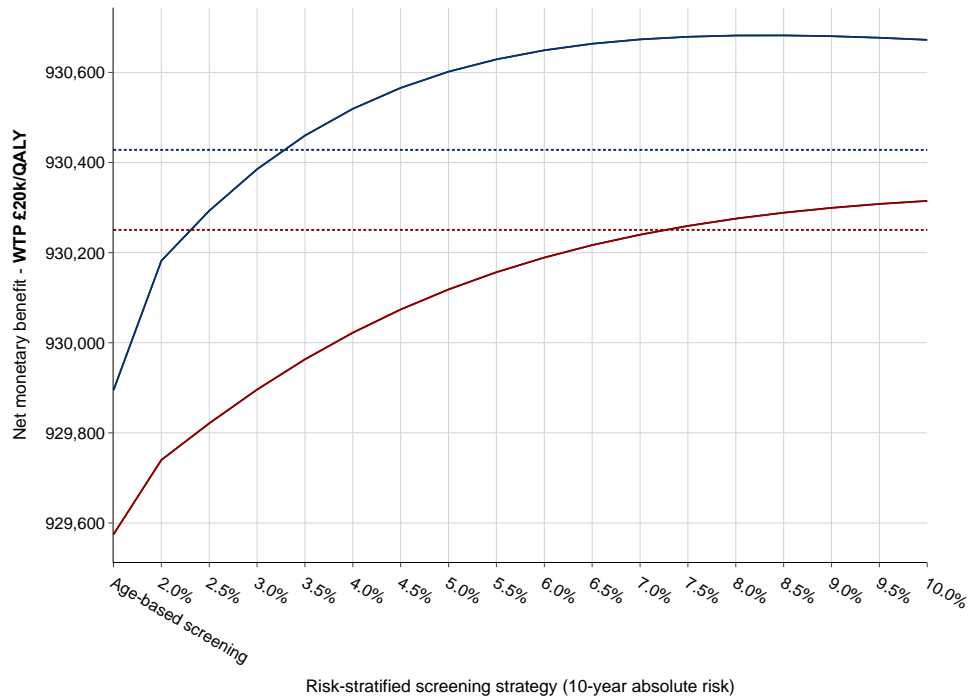

**A**

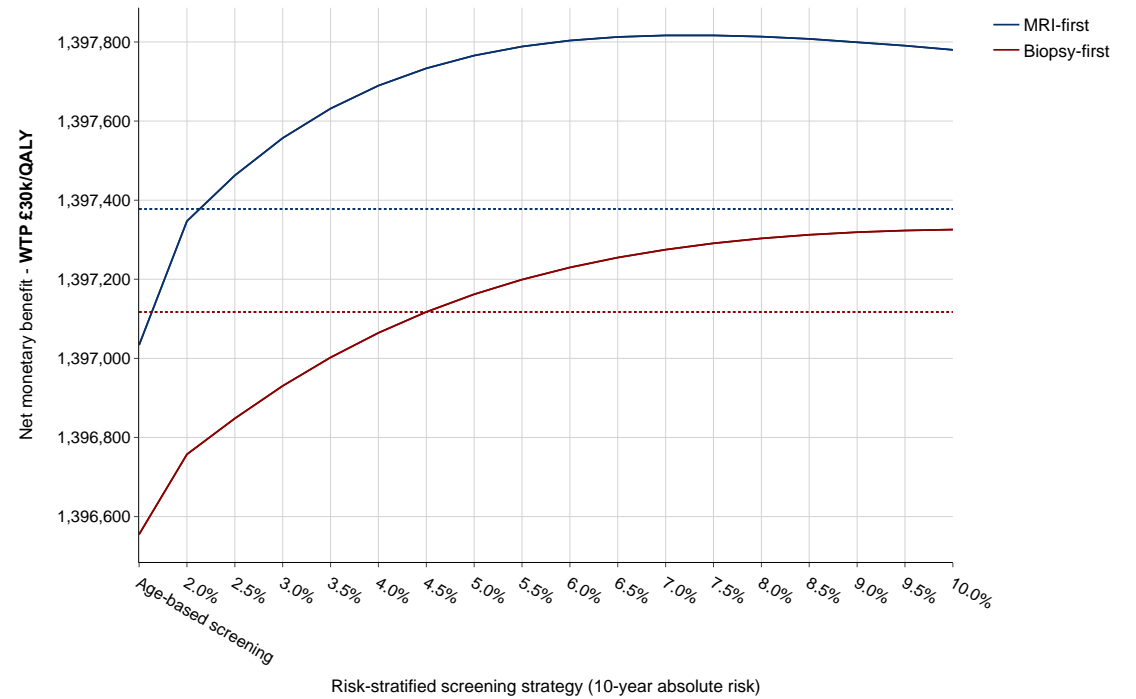

**B**

Net monetary benefit (NMB) of age-based, risk-stratified, and no screening at willingness-to-pay thresholds of £20,000 (A) and £30,000 (B) per QALY gained. Dotted horizontal lines in blue and red represent the net monetary benefit of no screening. NMB in GBP£ millions; multiply by ~1.3 to convert into US dollars. Abbreviations: NMB, net monetary benefit; WTP, willingness-to-pay; QALY, quality-adjusted life-year.

## Sensitivity Analyses

We performed sensitivity analyses to explore the impact of alternative assumptions regarding change in clinically significant and insignificant cancers detected with MRI, as well as different costs of MRI and polygenic risk assessment.

We based our alternative assumptions on the impact of MRI on clinically significant and insignificant cancers on the PRECISION trial.<sup>21</sup> This showed a decrease in the number of clinically *insignificant* cancers detected of -13% (95% CI: -7% to -19%), and an increase in clinically *significant* cancers detected of 12% (95% CI: 4% to 20%). These values were chosen as their confidence intervals include those seen in PROMIS.<sup>13</sup> We re-ran our probabilistic model using these estimates.

**eTable 5: Outcomes of no screening and MRI-first screening for prostate cancer per 10,000 men under assumptions from the PRECISION trial**

| Screening strategy                                | Prostate cancer cases (n) | Screen-detected cancers (n) | Overdiag-nosed Cases (n) | Deaths from prostate cancer (n) | MRI (n) | Biopsies (n) | Total life-years (n) | QALYs with prostate cancer (n) | QALYs - healthy (n) | Total QALYs (n) | Total Costs (£, 1,000s) | Net Monetary Benefit (£ 1,000s) |
|---------------------------------------------------|---------------------------|-----------------------------|--------------------------|---------------------------------|---------|--------------|----------------------|--------------------------------|---------------------|-----------------|-------------------------|---------------------------------|
| No Screening                                      | 1,224                     |                             |                          | 403                             | 2,102   | 1,411        | 134,635              | 4,228                          | 99,950              | 104,178         | 7,876                   | 2,075,676                       |
| Age-based screening                               | 1,445                     | 655                         | 154                      | 325                             | 4,288   | 2,878        | 134,902              | 6,104                          | 98,103              | 104,207         | 9,919                   | 2,074,223                       |
| Risk-stratified screening (10-year absolute risk) |                           |                             |                          |                                 |         |              |                      |                                |                     |                 |                         |                                 |
| 2.0%                                              | 1,400                     | 585                         | 138                      | 331                             | 3,369   | 2,262        | 134,882              | 5,865                          | 98,349              | 104,214         | 9,391                   | 2,074,892                       |
| 2.5%                                              | 1,382                     | 549                         | 130                      | 334                             | 3,114   | 2,090        | 134,871              | 5,754                          | 98,462              | 104,216         | 9,161                   | 2,075,154                       |
| 3.0%                                              | 1,364                     | 512                         | 122                      | 337                             | 2,901   | 1,947        | 134,859              | 5,641                          | 98,576              | 104,217         | 8,964                   | 2,075,374                       |
| 3.5%                                              | 1,348                     | 476                         | 113                      | 341                             | 2,727   | 1,830        | 134,847              | 5,530                          | 98,688              | 104,218         | 8,797                   | 2,075,554                       |
| 4.0%                                              | 1,333                     | 441                         | 105                      | 344                             | 2,585   | 1,736        | 134,834              | 5,424                          | 98,794              | 104,218         | 8,657                   | 2,075,701                       |
| 4.5%                                              | 1,319                     | 408                         | 98                       | 348                             | 2,471   | 1,659        | 134,822              | 5,325                          | 98,893              | 104,218         | 8,540                   | 2,075,818                       |
| 5.0%                                              | 1,307                     | 377                         | 90                       | 351                             | 2,379   | 1,597        | 134,811              | 5,232                          | 98,986              | 104,218         | 8,442                   | 2,075,910                       |
| 5.5%                                              | 1,295                     | 349                         | 84                       | 354                             | 2,304   | 1,547        | 134,800              | 5,147                          | 99,071              | 104,217         | 8,361                   | 2,075,983                       |
| 6.0%                                              | 1,285                     | 322                         | 77                       | 357                             | 2,244   | 1,506        | 134,789              | 5,068                          | 99,149              | 104,217         | 8,292                   | 2,076,039                       |
| 6.5%                                              | 1,277                     | 298                         | 72                       | 360                             | 2,195   | 1,473        | 134,780              | 4,996                          | 99,220              | 104,216         | 8,236                   | 2,076,081                       |
| 7.0%                                              | 1,269                     | 276                         | 66                       | 363                             | 2,156   | 1,447        | 134,771              | 4,930                          | 99,285              | 104,215         | 8,188                   | 2,076,112                       |
| 7.5%                                              | 1,262                     | 255                         | 61                       | 365                             | 2,124   | 1,426        | 134,762              | 4,869                          | 99,345              | 104,214         | 8,149                   | 2,076,134                       |
| 8.0%                                              | 1,255                     | 236                         | 57                       | 368                             | 2,098   | 1,409        | 134,754              | 4,814                          | 99,399              | 104,213         | 8,116                   | 2,076,148                       |
| 8.5%                                              | 1,250                     | 219                         | 53                       | 370                             | 2,078   | 1,395        | 134,747              | 4,764                          | 99,448              | 104,212         | 8,088                   | 2,076,156                       |
| 9.0%                                              | 1,245                     | 203                         | 49                       | 372                             | 2,062   | 1,384        | 134,740              | 4,718                          | 99,493              | 104,211         | 8,066                   | 2,076,158                       |
| 9.5%                                              | 1,241                     | 188                         | 46                       | 374                             | 2,049   | 1,376        | 134,734              | 4,676                          | 99,534              | 104,210         | 8,047                   | 2,076,157                       |
| 10.0%                                             | 1,237                     | 174                         | 42                       | 375                             | 2,039   | 1,369        | 134,728              | 4,638                          | 99,571              | 104,209         | 8,031                   | 2,076,152                       |

In all scenarios shown in eTable 4, both clinically-detected and screen-detected cancers were assumed to have an MRI prior to biopsy, under PRECISION trial-based estimates regarding clinically significant and insignificant cancers detected. Net monetary benefit at a willingness-to-pay of £20,000 (\$26,000) per QALY gained. Results derived from 10,000 simulations. To convert to US \$, multiply by approximately 1.3. Abbreviations: QALYs, quality-adjusted life-years.

**eFigure 5: Benefit/harm profile per 10,000 men with MRI-first screening using parameter estimates from the PRECISION trial**

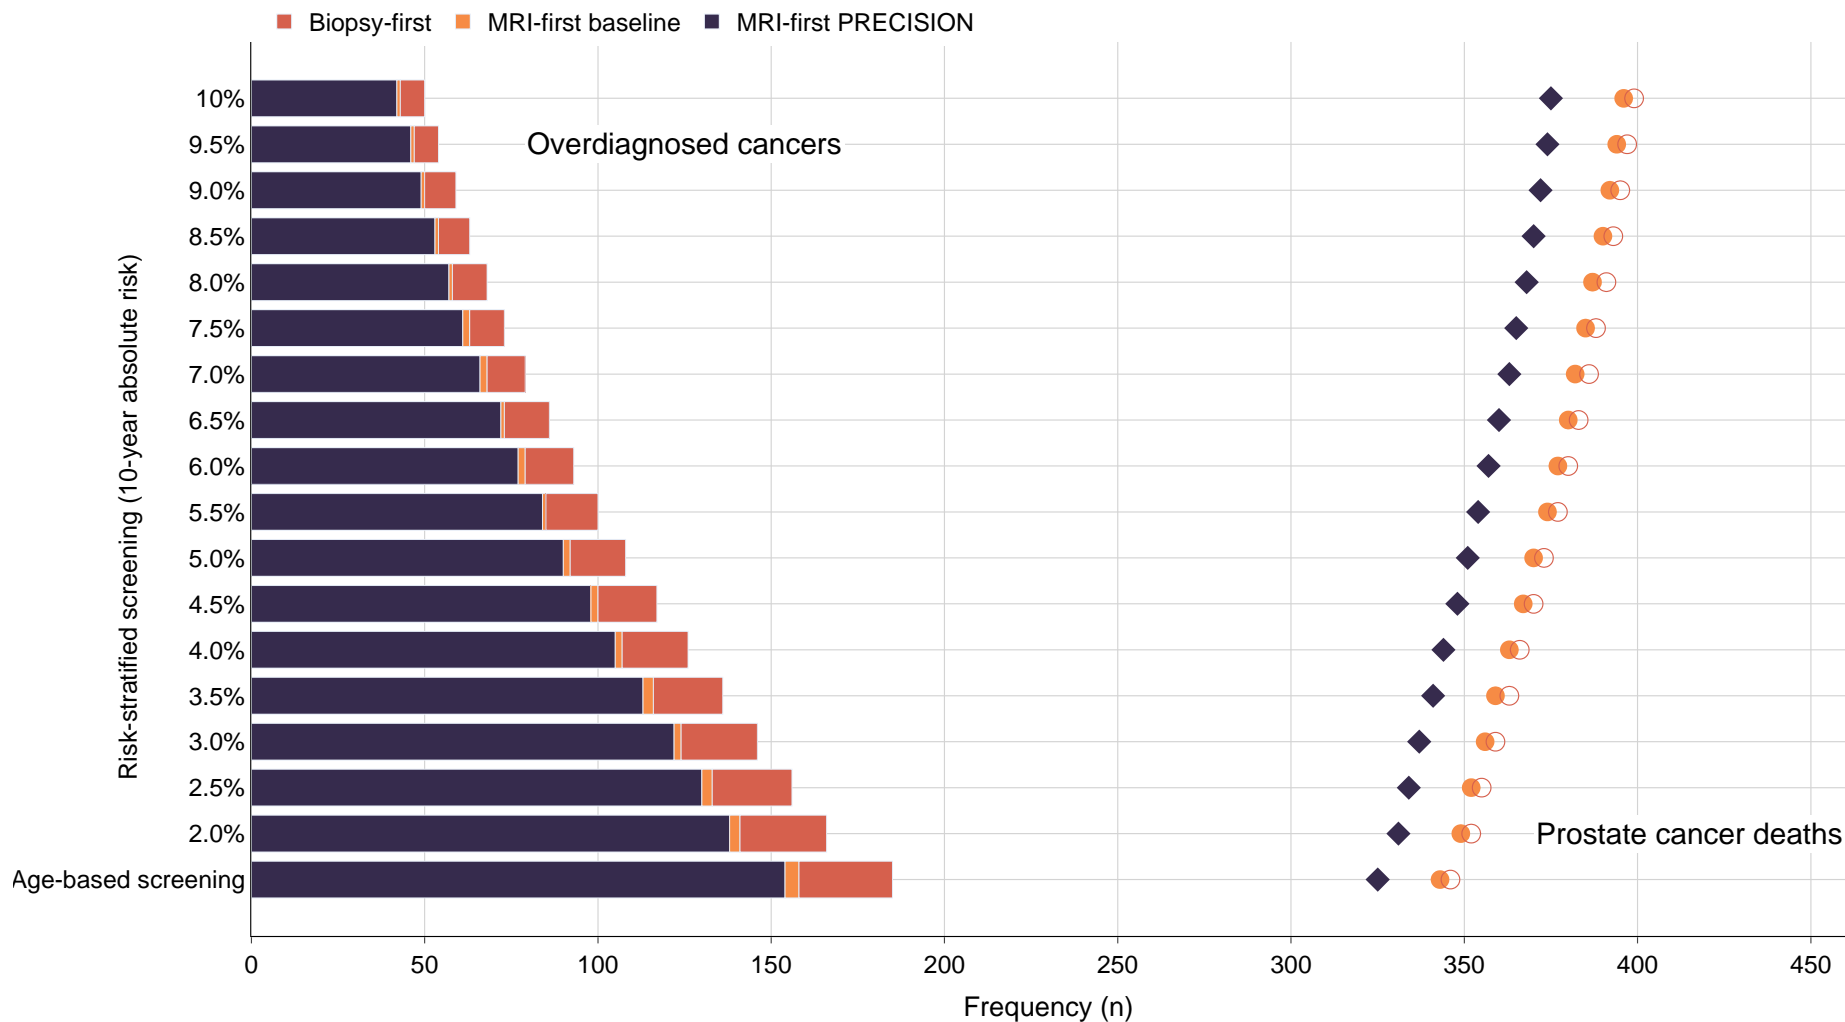

The number of overdiagnosed cancers and prostate cancer-specific deaths per 10,000 men under parameter estimates from PRECISION<sup>21</sup> are shown. The relative changes were:



MRI-first baseline:

- Clinically insignificant cancers: -8.2%, 95% CI: -6 to -10.3
- Clinically significant cancers: 2%, 95% CI: 1.1% to 4.6%

MRI-first PRECISION:

- Clinically insignificant cancers: -13%, 95% CI: -7% to -19%
- Clinically significant cancers: 12%, 95% CI: 4% to 20%

Dark blue diamonds refer to prostate cancer-specific deaths under PRECISION assumptions, yellow filled-in circles under baseline assumptions, and orange open circles with a biopsy-first diagnostic pathway. The bars reflect overdiagnosed cancers.

**eFigure 6: Net monetary benefit per 10,000 men of MRI-first screening and no screening using parameter estimates from the PRECISION trial**

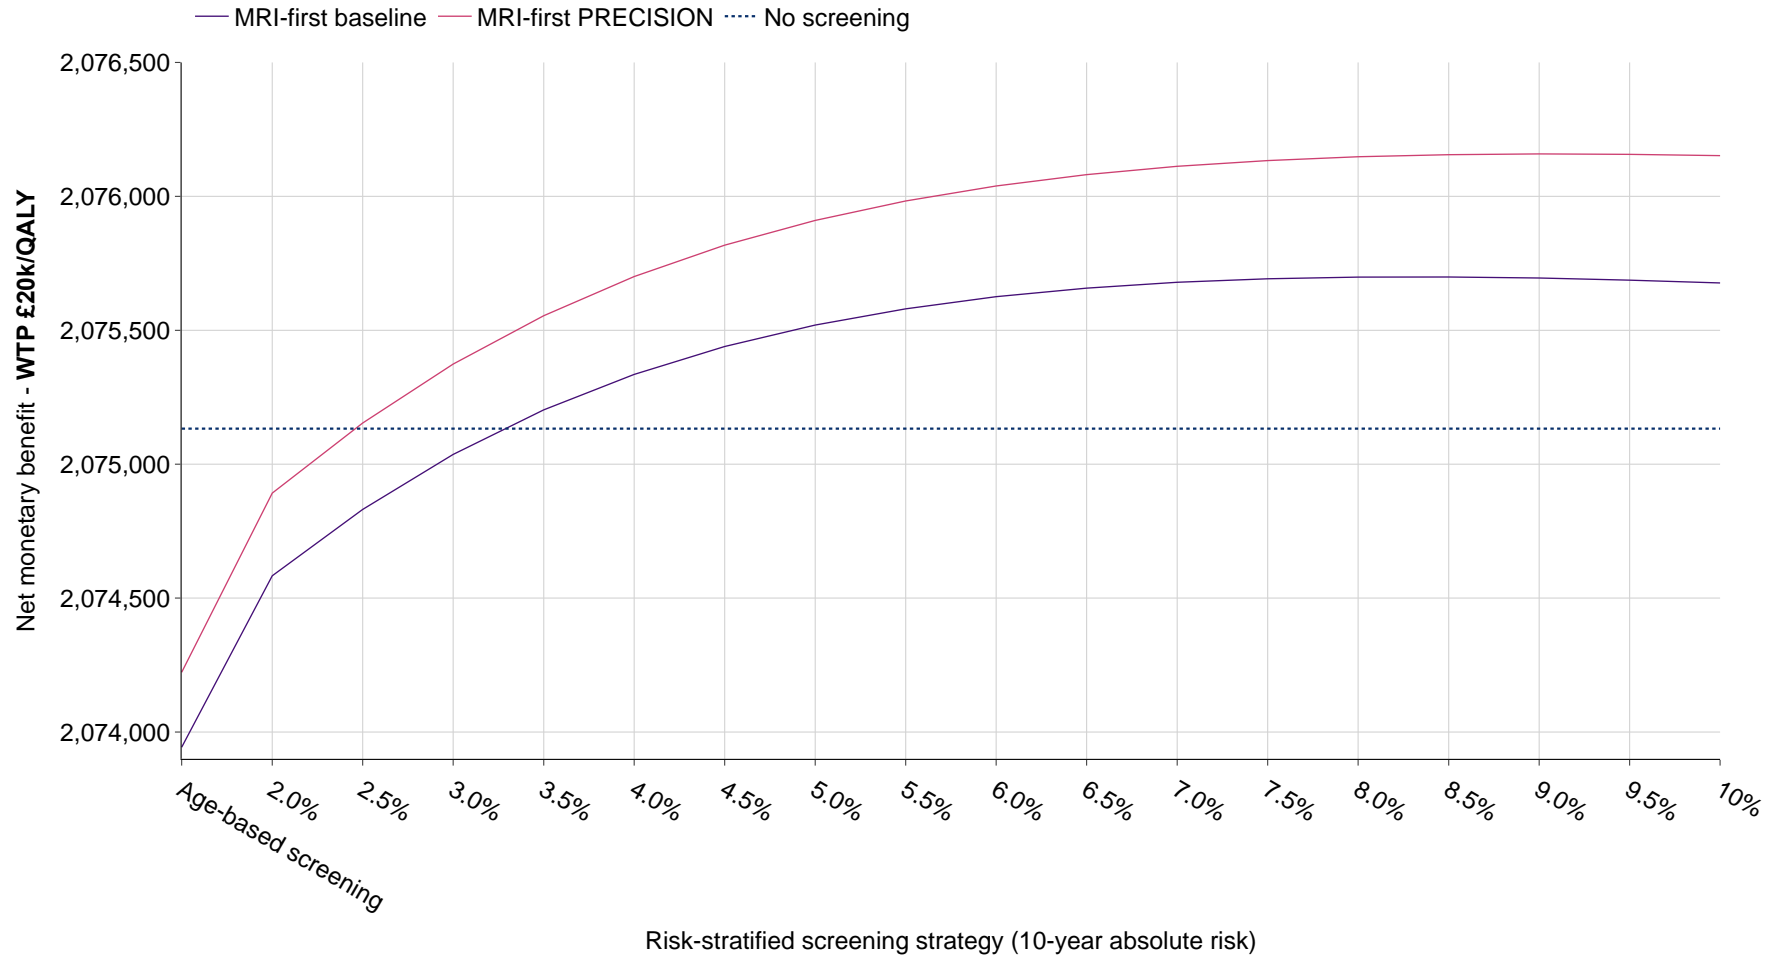

NMB at a WTP threshold of £20,000 (\$26,000) per quality-adjusted life-year gained. Results based on 10,000 simulations and displayed in NMB (£1000s). To convert to US \$, multiply by approximately 1.3. Abbreviations: NMB, net monetary benefit; WTP, willingness-to-pay; CIS, clinically insignificant cancers; QALY, quality-adjusted life-year.

**eFigure 7: Net monetary benefit per 10,000 men of MRI-first screening and no screening at different costs of MRI**

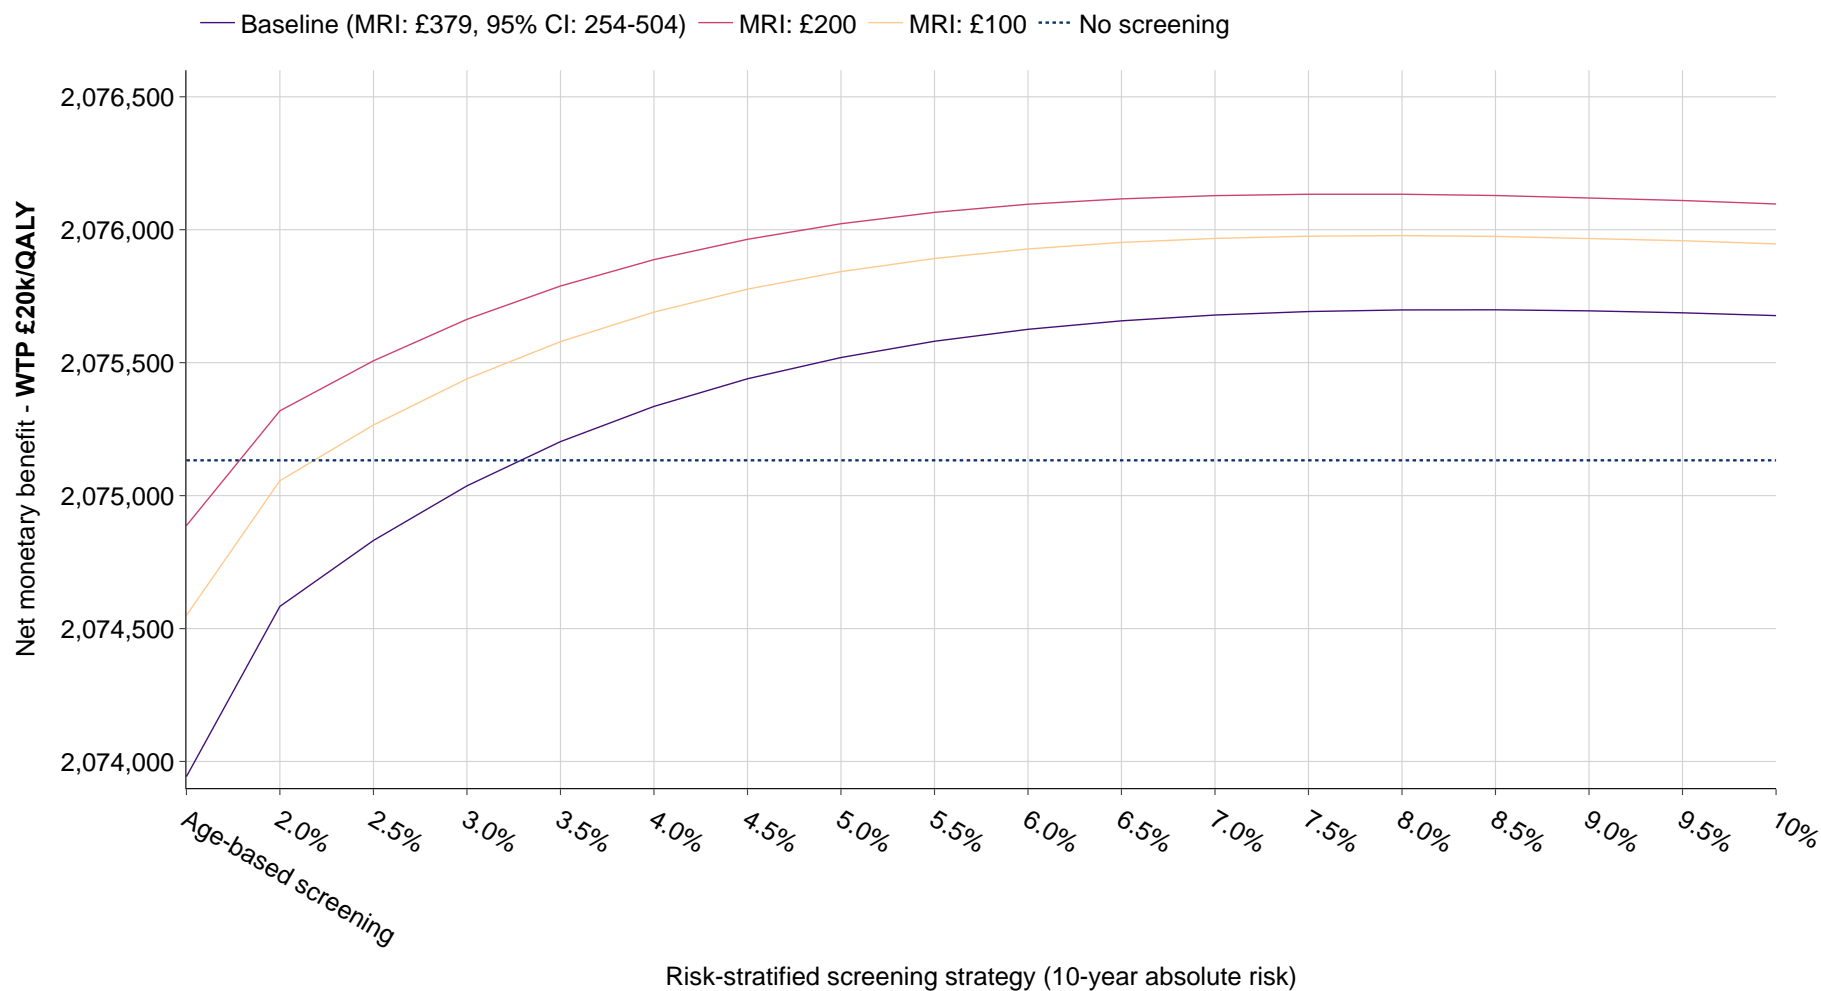

NMB at a WTP of £20,000 (\$26,000) per QALY gained. At a cost per MRI of £200 (\$260), all MRI-first Risk-stratified screening strategies studied had a higher NMB than no screening. Results based on 10,000 simulations and displayed in NMB (£1000s). To convert to US \$, multiply by approximately 1.3. Abbreviations: NMB, net monetary benefit; WTP, willingness-to-pay; CI, confidence intervals; QALY, quality-adjusted life-year.

**eFigure 8: Net monetary benefit per 10,000 men of MRI-first screening and no screening at different costs of polygenic risk stratification**

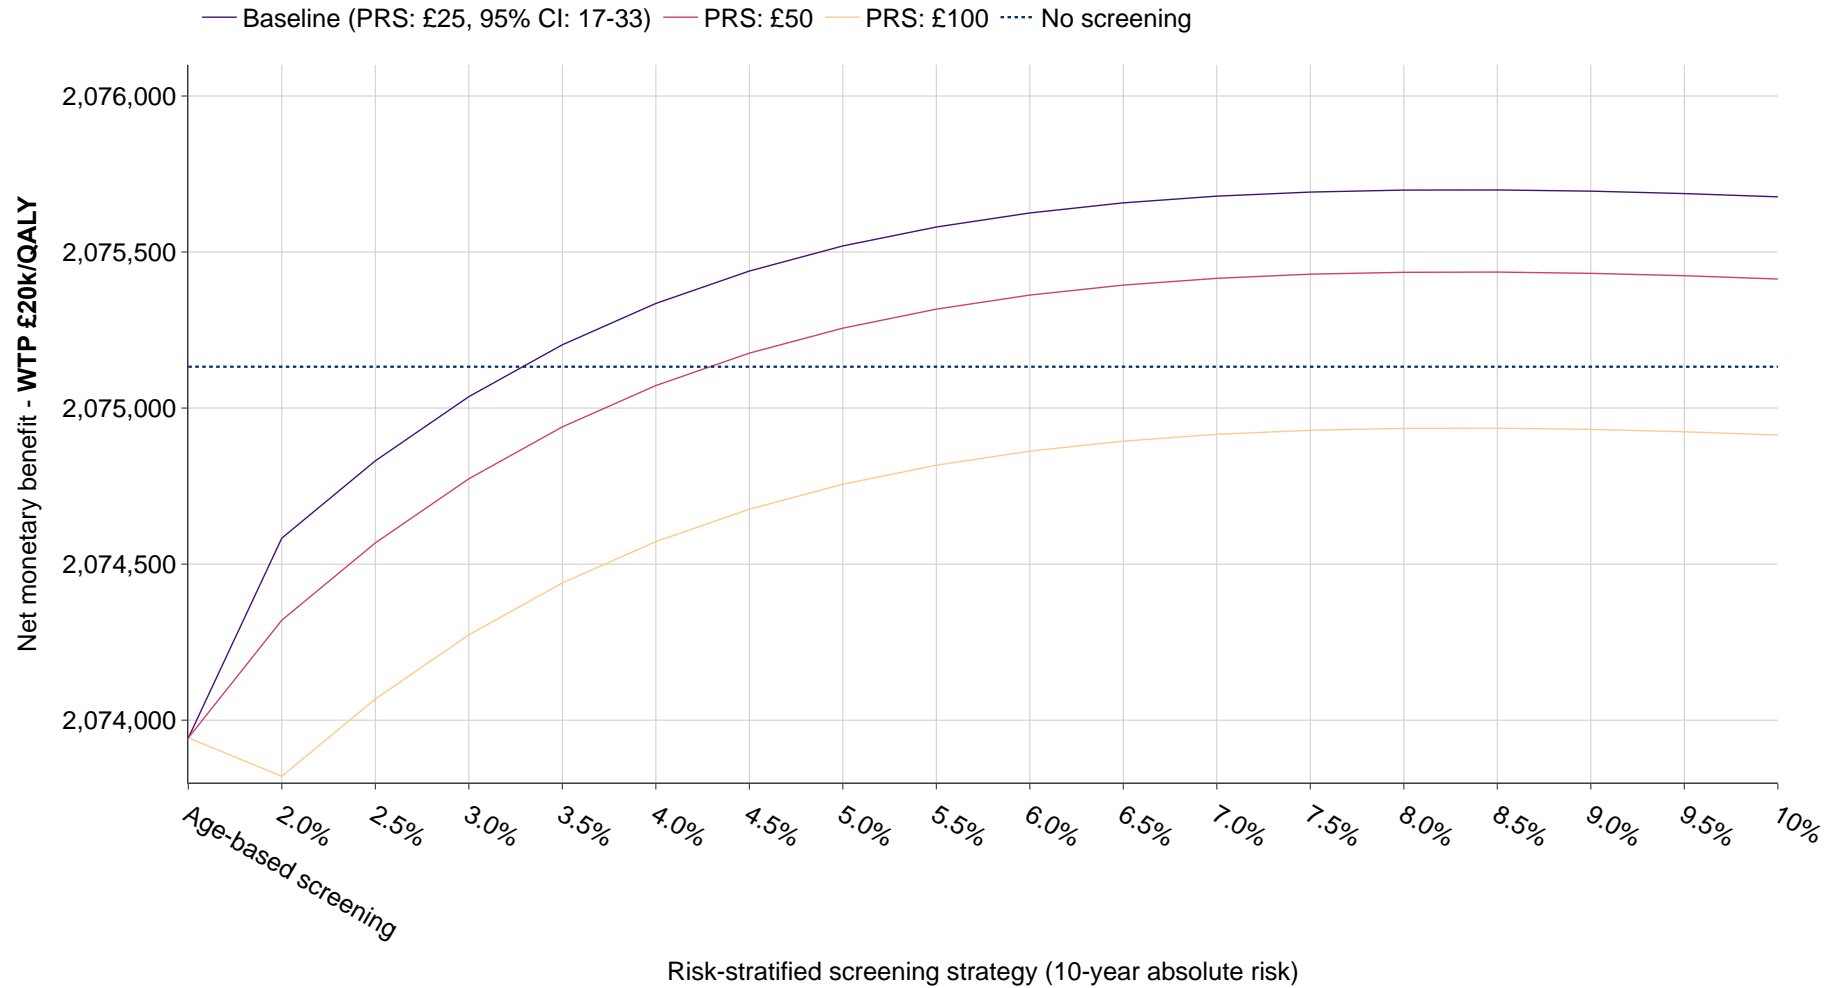

Net monetary benefit at a willingness-to-pay threshold of £20,000 (\$26,000) per quality-adjusted life-year gained. Results based on 10,000 simulations and displayed in NMB (£1000s). To convert to US \$, multiply by approximately 1.3. Abbreviations: WTP, willingness-to-pay; PRS, polygenic risk score; CI, confidence intervals; QALYs, quality-adjusted life-years.

**eFigure 9: Net monetary benefit per 10,000 men of MRI-first screening and no screening at 75% uptake of PSA screening and polygenic risk stratification**

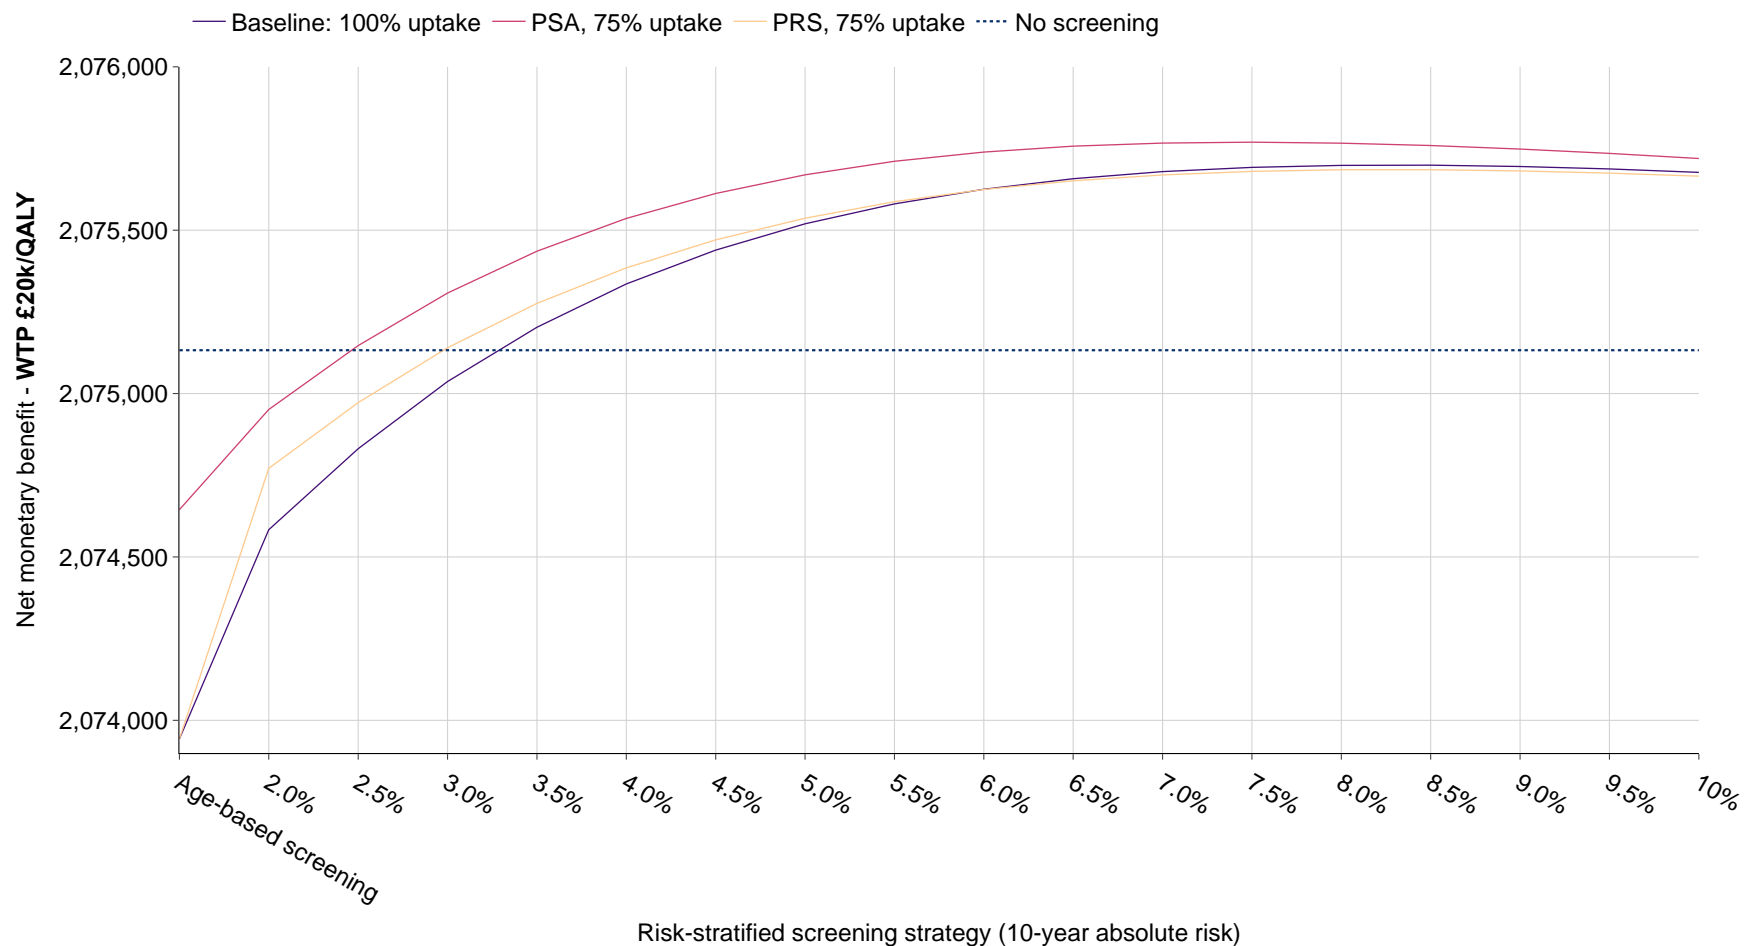

Net monetary benefit (NMB) at a willingness-to-pay threshold of £20,000 (\$26,000) per quality-adjusted life-year gained. Each parameter is varied separately. For example, the curve in pink reflects 75% uptake of initial PSA screening, but assumes that of those 75% who take up screening, 100% will undergo risk-stratification in the risk-stratified cohorts. Results based on 10,000 simulations and displayed in NMB (£1000s). To convert to US \$, multiply by approximately 1.3. Abbreviations: WTP, willingness-to-pay; PRS, polygenic risk score; CI, confidence intervals; QALYs, quality-adjusted life-years.

eFigure 10: Overdiagnosed cancers and prostate cancer deaths prevented per 10,000 men of MRI-first risk-stratified compared to MRI-first age-based screening when overdiagnosis varies by polygenic risk

— Overdiagnosis: varying by polygenic risk    - - Overdiagnosis: baseline    — Prostate cancer deaths

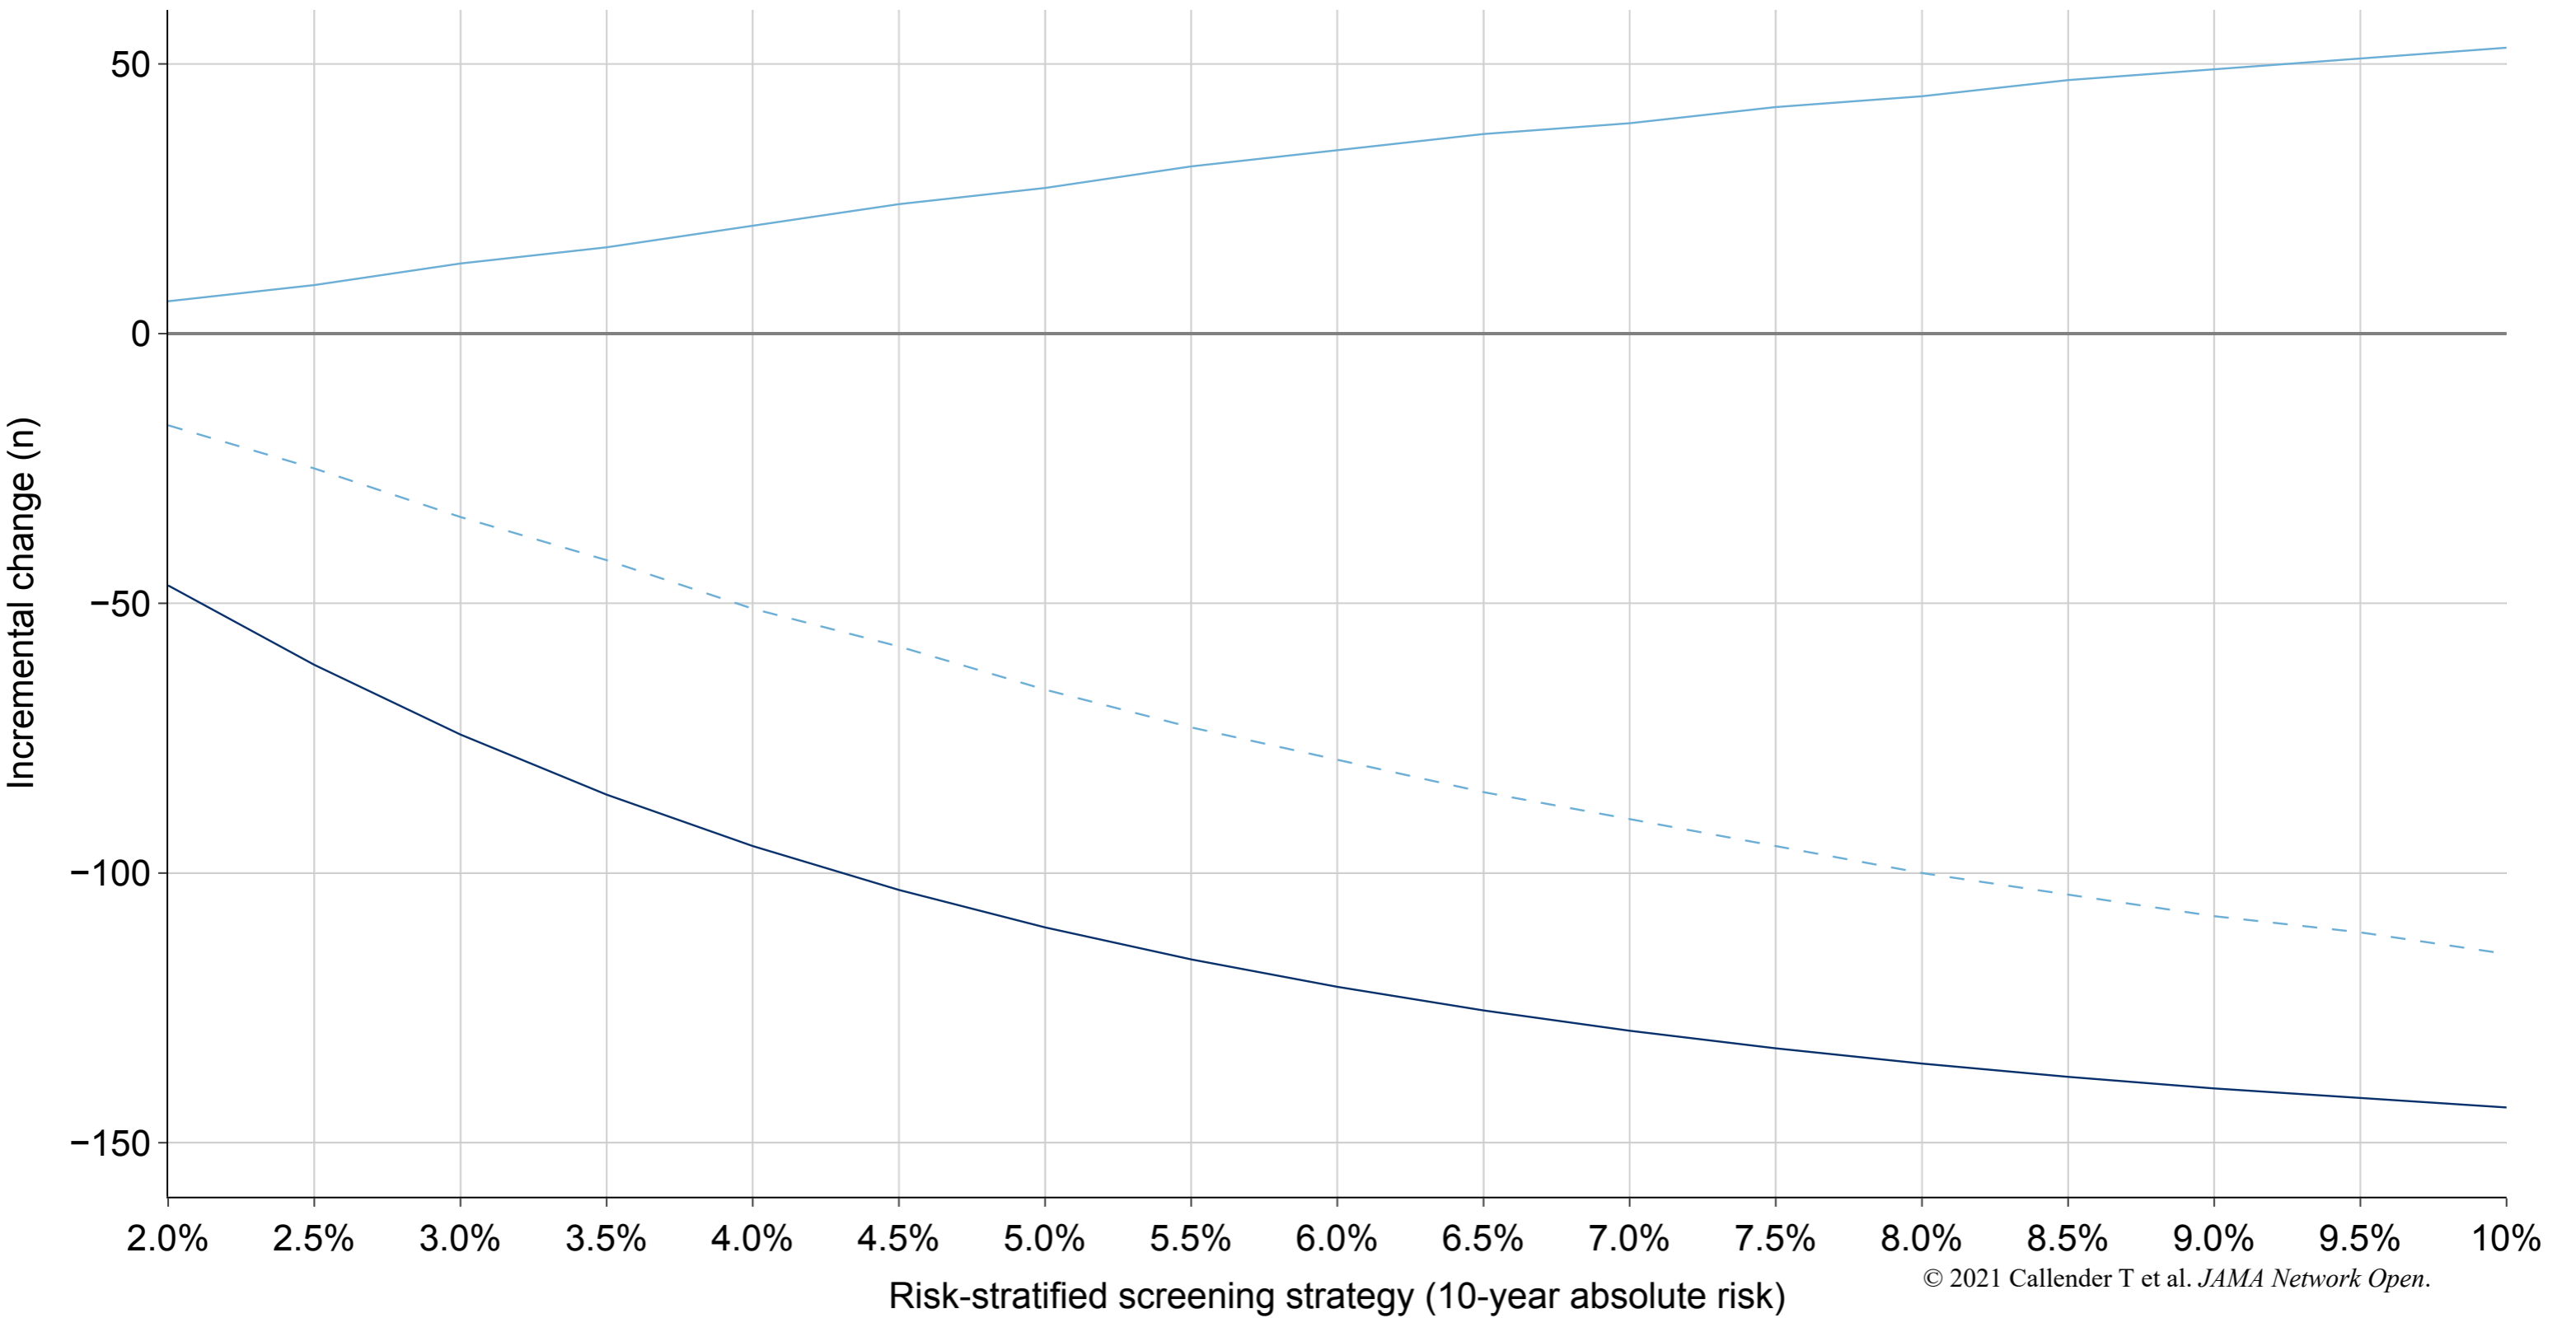

**eFigure 11: Observed vs predicted incidence rate**

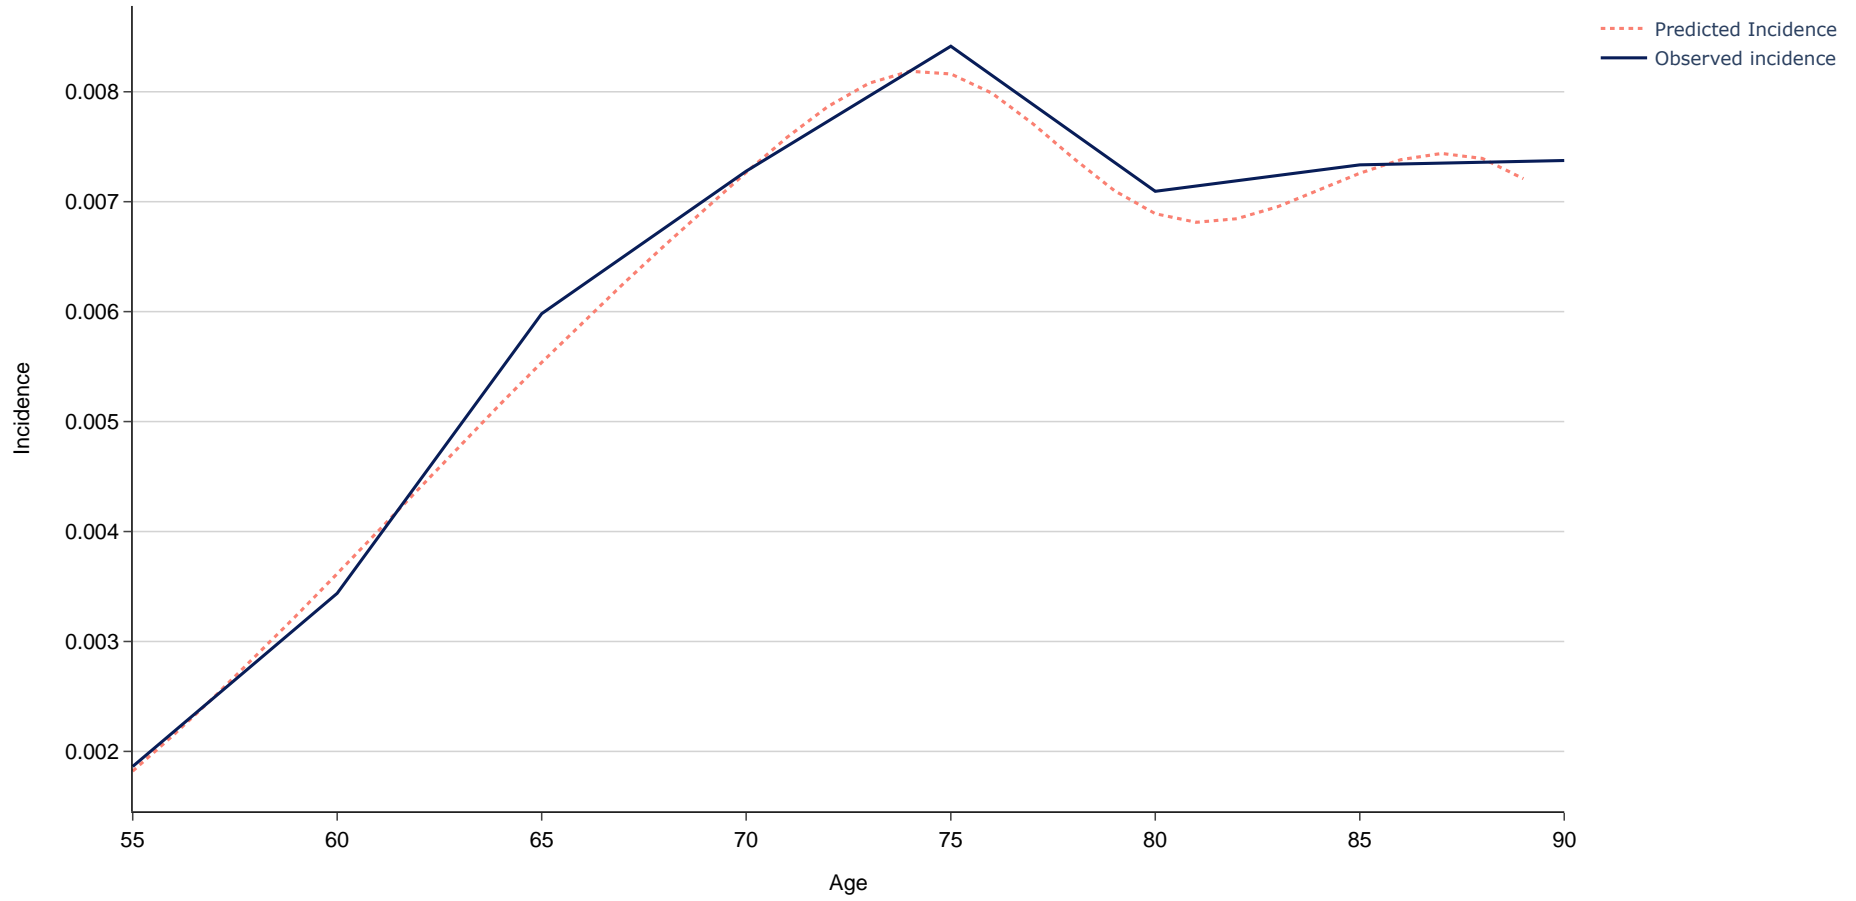

Calibration of predicted incidence rate (in the absence of screening) to the observed rate.

**eFigure 12: Observed vs predicted mortality rate**

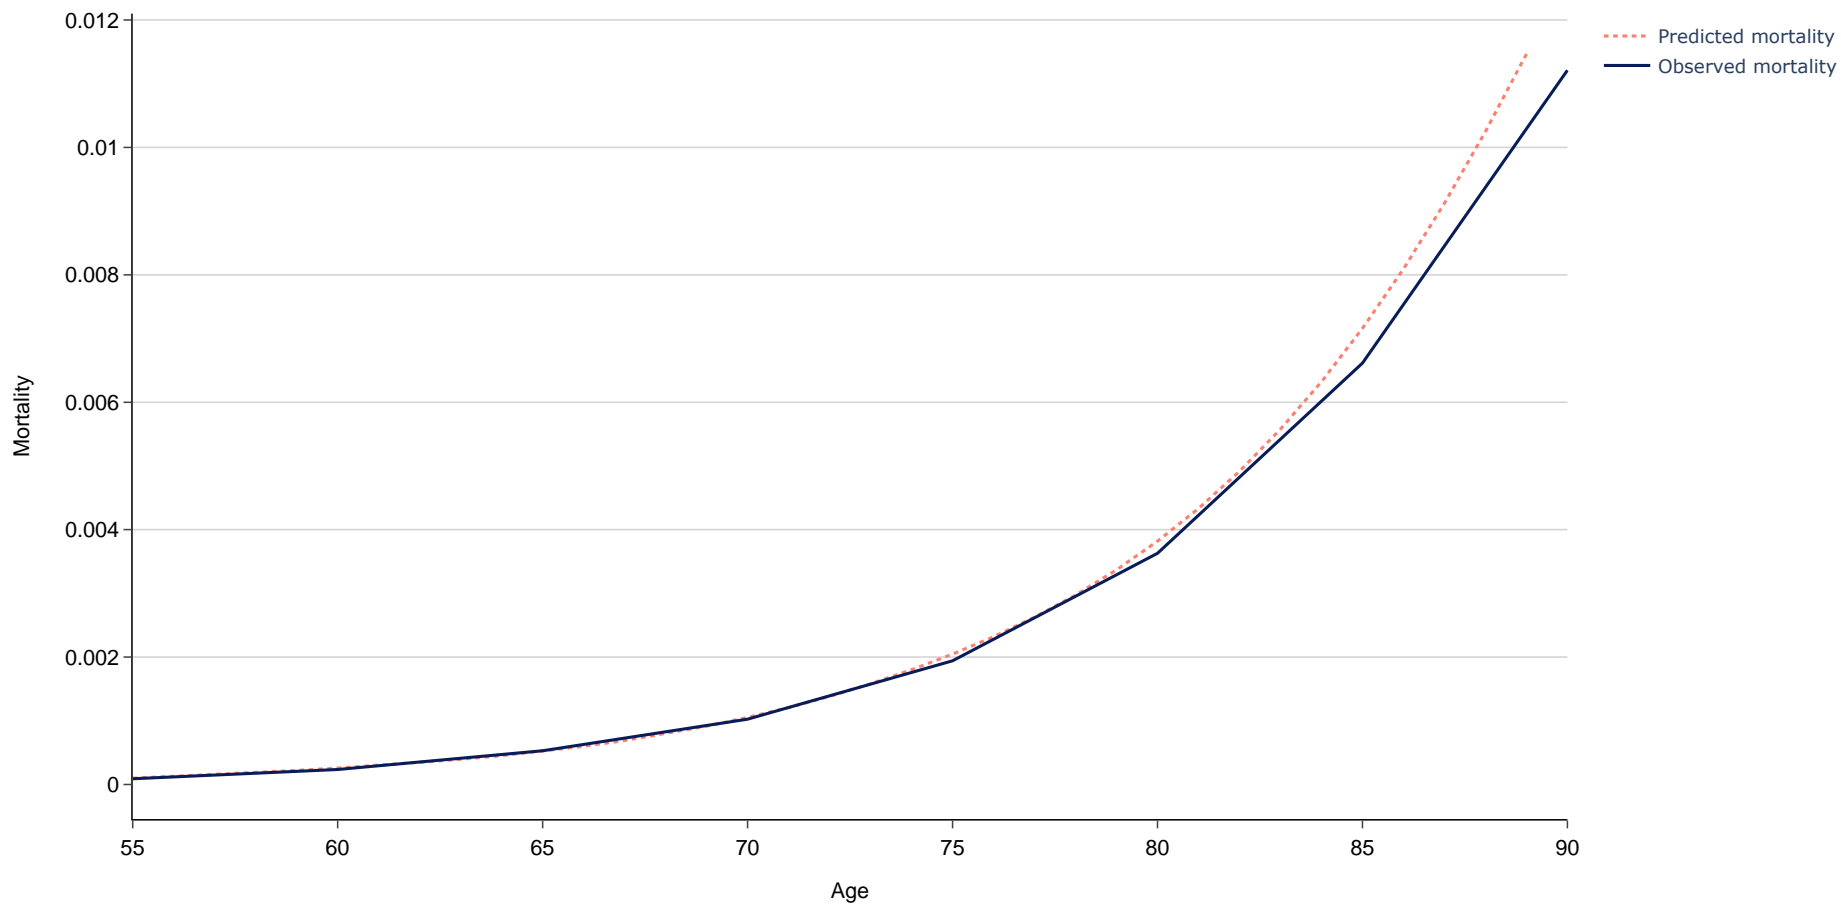

Calibration of predicted mortality rate (in the absence of screening) to the observed rate.



## eReferences

1. Callender T, Emberton M, Morris S, et al. Polygenic risk-tailored screening for prostate cancer: A benefit-harm and cost-effectiveness modelling study. *PLoS Med*. 2019;16(12):e1002998. doi:10.1371/journal.pmed.1002998
2. Hjelmborg JB, Scheike T, Holst K, et al. The Heritability of Prostate Cancer in the Nordic Twin Study of Cancer. *Cancer Epidemiol Biomarkers Prev*. 2014;23(11):2303-2310. doi:10.1158/1055-9965.EPI-13-0568
3. Mucci LA, Hjelmborg JB, Harris JR, et al. Familial Risk and Heritability of Cancer Among Twins in Nordic Countries. *JAMA*. 2016;315(1):68. doi:10.1001/jama.2015.17703
4. Pharoah PDP, Antoniou A, Bobrow M, Zimmern RL, Easton DF, Ponder BAJ. Polygenic susceptibility to breast cancer and implications for prevention. *Nat Genet*. 2002;31(1):33-36. doi:10.1038/ng853
5. Dadaev T, Saunders EJ, Newcombe PJ, et al. Fine-mapping of prostate cancer susceptibility loci in a large meta-analysis identifies candidate causal variants. *Nat Commun*. 2018;9(1):2256. doi:10.1038/s41467-018-04109-8
6. NICE. *NICE Guideline NG131: Prostate Cancer: Biology, Diagnosis and Management*. London, U.K.; 2019.
7. National Collaborating Centre for Cancer. *Prostate Cancer: Diagnosis and Treatment: Clinical Guideline*. London; 2014. <https://www.nice.org.uk/guidance/CG175>.
8. Rosario DJ, Lane JA, Metcalfe C, et al. Short term outcomes of prostate biopsy in men tested for cancer by prostate specific antigen: prospective evaluation within ProtecT study. *BMJ*. 2012;344(jan09 1):d7894-d7894. doi:10.1136/bmj.d7894
9. Department of Health. NHS reference costs 2015 to 2016. <https://www.gov.uk/government/publications/nhs-reference-costs-2015-to-2016>. Accessed July 19, 2018.
10. Office for National Statistics. CPI Index. 2020. <https://www.ons.gov.uk/economy/inflationandpriceindices/timeseries/d7fc/mm23>. Accessed March 20, 2020.
11. Hamdy FC, Donovan JL, Lane JA, et al. 10-Year Outcomes after Monitoring, Surgery, or Radiotherapy for Localized Prostate Cancer. *N Engl J Med*. 2016;375(15):1415-1424. doi:10.1056/NEJMoa1606220
12. Leal J, Welton NJ, Martin RM, et al. Estimating the sensitivity of a prostate cancer screening programme for different PSA cut-off levels: A UK case study. *Cancer Epidemiol*. 2018;52:99-105. doi:10.1016/j.canep.2017.12.002
13. Ahmed HU, El-Shater Bosaily A, Brown LC, et al. Diagnostic accuracy of multi-parametric MRI and TRUS biopsy in prostate cancer (PROMIS): a paired validating confirmatory study. *Lancet*. 2017;389(10071):815-822. doi:10.1016/S0140-6736(16)32401-1
14. Drost F-JH, Osses DF, Nieboer D, et al. Prostate MRI, with or without MRI-targeted biopsy, and systematic biopsy for detecting prostate cancer. *Cochrane Database Syst Rev*. 2019;18(1):e728-e729. doi:10.1002/14651858.CD012663.pub2
15. Elwenspoek MMC, Sheppard AL, McInnes MDF, et al. Comparison of Multiparametric Magnetic Resonance Imaging and Targeted Biopsy With Systematic Biopsy Alone for the Diagnosis of Prostate Cancer. *JAMA Netw Open*. 2019;2(8):e198427. doi:10.1001/jamanetworkopen.2019.8427
16. NICE. *Resource Impact Report: Prostate Cancer: Diagnosis and Management (Update) (NG131)*; 2019. <https://www.nice.org.uk/guidance/ng136/resources/resource-impact-report-pdf-6899957101>.
17. Pashayan N, Pharoah P, Neal DE, et al. Stage shift in PSA-detected prostate cancers - Effect modification by Gleason score. *J Med Screen*. 2009;16(2):98-101. doi:10.1258/jms.2009.009037
18. Ahdoot M, Wilbur AR, Reese SE, et al. MRI-Targeted, Systematic, and Combined Biopsy for Prostate Cancer Diagnosis. *N Engl J Med*. 2020;382(10):917-928. doi:10.1056/NEJMoa1910038
19. Dell'Oglio P, Stabile A, Dias BH, et al. Impact of multiparametric MRI and MRI-targeted biopsy on pre-therapeutic risk assessment in prostate cancer patients candidate for radical prostatectomy. *World J Urol*. 2019;37(2):221-234. doi:10.1007/s00345-018-2360-1
20. Pashayan N, Duffy SW, Pharoah P, et al. Mean sojourn time, overdiagnosis, and reduction in advanced stage prostate cancer due to screening with PSA: Implications of sojourn time on screening. *Br J Cancer*. 2009;100(7):1198-1204. doi:10.1038/sj.bjc.6604973
21. Kasivisvanathan V, Rannikko AS, Borghi M, et al. MRI-Targeted or Standard Biopsy for Prostate-Cancer Diagnosis. *N Engl J Med*. 2018;378(19):1767-1777. doi:10.1056/NEJMoa1801993
22. Pashayan N, Duffy SW, Neal DE, et al. Implications of polygenic risk-stratified screening for prostate cancer on overdiagnosis. *Genet Med*. 2015;17(10):789-795. doi:10.1038/gim.2014.192
